# Supplementary material for: Efficient organic DSSC sensitizers bearing an electron-deficient pyrimidine as an effective π-spacer
Source: Royal Society of Chemistry journal article supplement (doi:10.1039/c1jm10201j), 2011-01-01

## Supporting Information

### Efficient Organic DSSC Sensitizers Bearing an Electron-Deficient Pyrimidine as an Effective $\pi$ -Spacer

Li-Yen Lin,<sup>a</sup> Chih-Hung Tsai,<sup>b</sup> Ken-Tsung Wong,<sup>\*a</sup> Tsung-Wei Huang,<sup>b</sup> Chung-Chih Wu,<sup>\*b</sup>

Shu-Hua Chou,<sup>a</sup> Francis Lin,<sup>a</sup> Shinn-Horng Chen,<sup>c</sup> An-I Tsai<sup>c</sup>

<sup>a</sup>Department of Chemistry, National Taiwan University, Taipei 10617,  
Taiwan

<sup>b</sup>Department of Electrical Engineering, Graduate Institute of Photonics and Optoelectronics, and Graduate Institute of  
Electronics Engineering, National Taiwan University, Taipei 10617, Taiwan

<sup>c</sup>Energy Material Research Group, Eternal Chemical Co., Ltd., Kaohsiung 821, Taiwan

## Table of Contents

|                                                                              |                |
|------------------------------------------------------------------------------|----------------|
| <sup>1</sup> H NMR, <sup>13</sup> C NMR spectra for compound <b>2a</b>       | <b>S3–S4</b>   |
| <sup>1</sup> H NMR, <sup>13</sup> C NMR spectra for compound <b>2b</b>       | <b>S5–S6</b>   |
| <sup>1</sup> H NMR, <sup>13</sup> C NMR spectra for compound <b>2c</b>       | <b>S7–S8</b>   |
| <sup>1</sup> H NMR, <sup>13</sup> C NMR spectra for compound <b>3a</b>       | <b>S9–S10</b>  |
| <sup>1</sup> H NMR, <sup>13</sup> C NMR spectra for compound <b>3b</b>       | <b>S11–S12</b> |
| <sup>1</sup> H NMR, <sup>13</sup> C NMR spectra for compound <b>3c</b>       | <b>S13–S14</b> |
| <sup>1</sup> H NMR, <sup>13</sup> C NMR spectra for compound <b>DPTP</b>     | <b>S15–S16</b> |
| <sup>1</sup> H NMR, <sup>13</sup> C NMR spectra for compound <b>OMeDPTP</b>  | <b>S17–S18</b> |
| <sup>1</sup> H NMR, <sup>13</sup> C NMR spectra for compound <b>OHexDPTP</b> | <b>S19–S20</b> |
| <sup>1</sup> H NMR, <sup>13</sup> C NMR spectra for compound <b>4</b>        | <b>S21–S22</b> |
| <sup>1</sup> H NMR, <sup>13</sup> C NMR spectra for compound <b>M-TP</b>     | <b>S23–S24</b> |

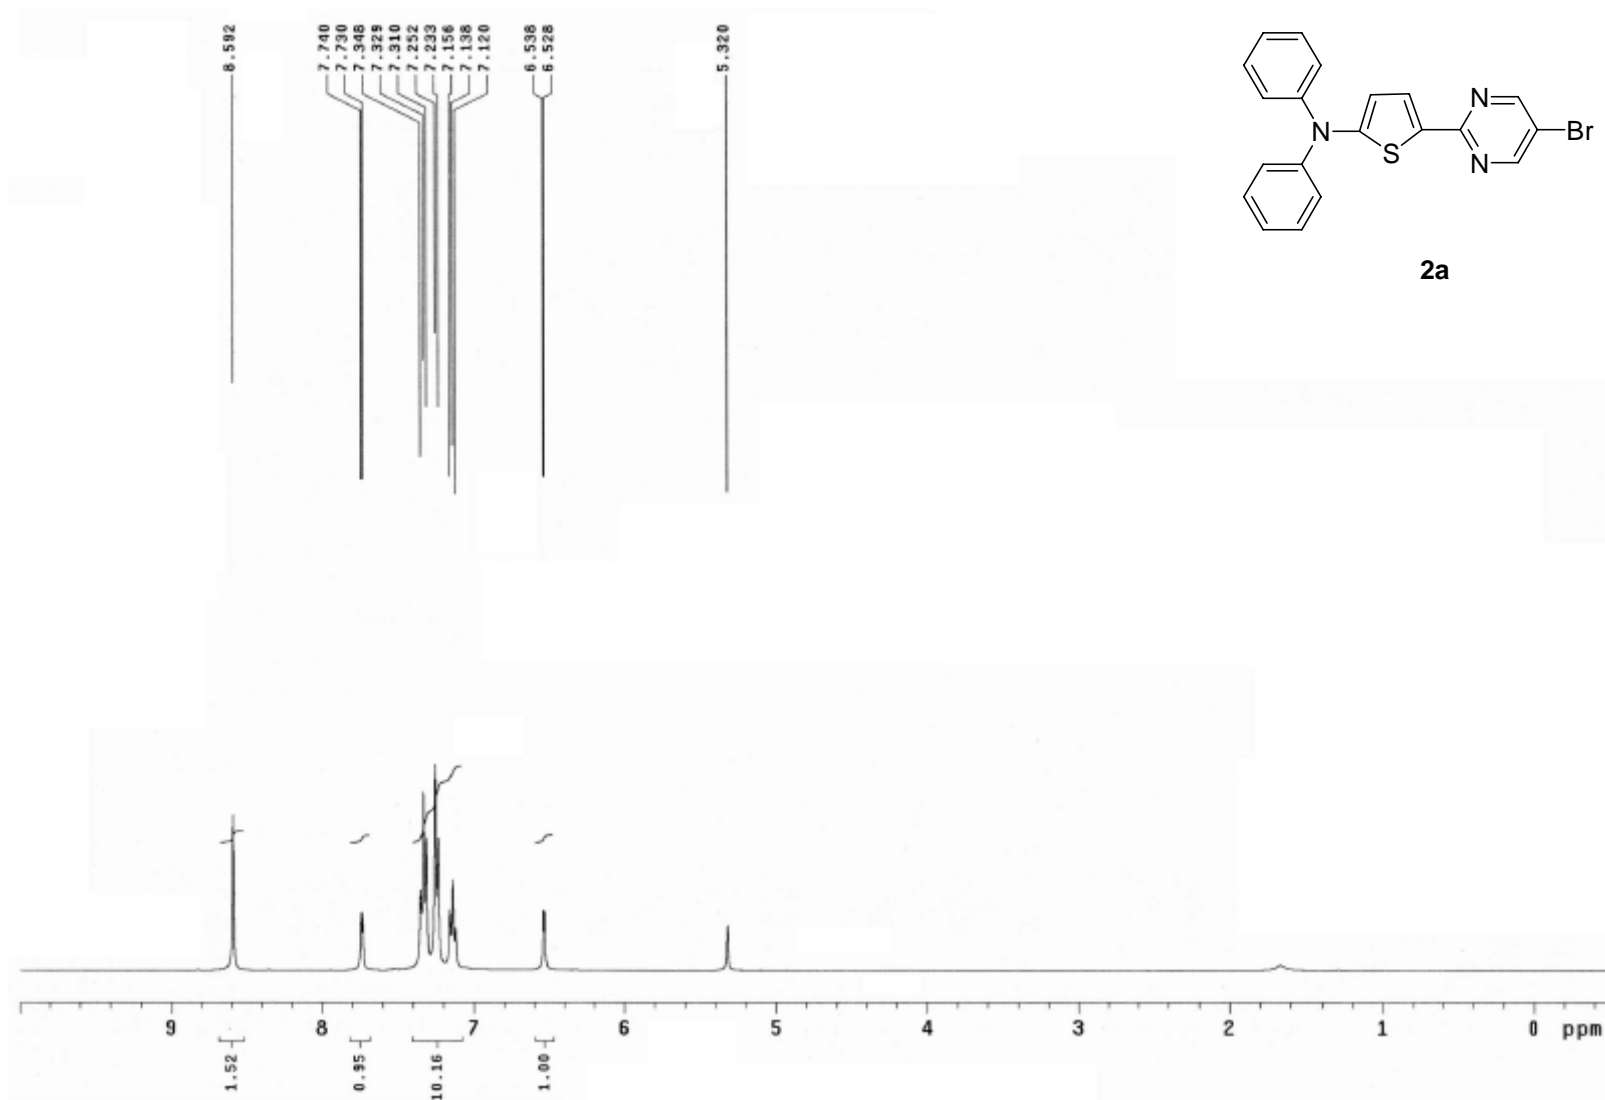

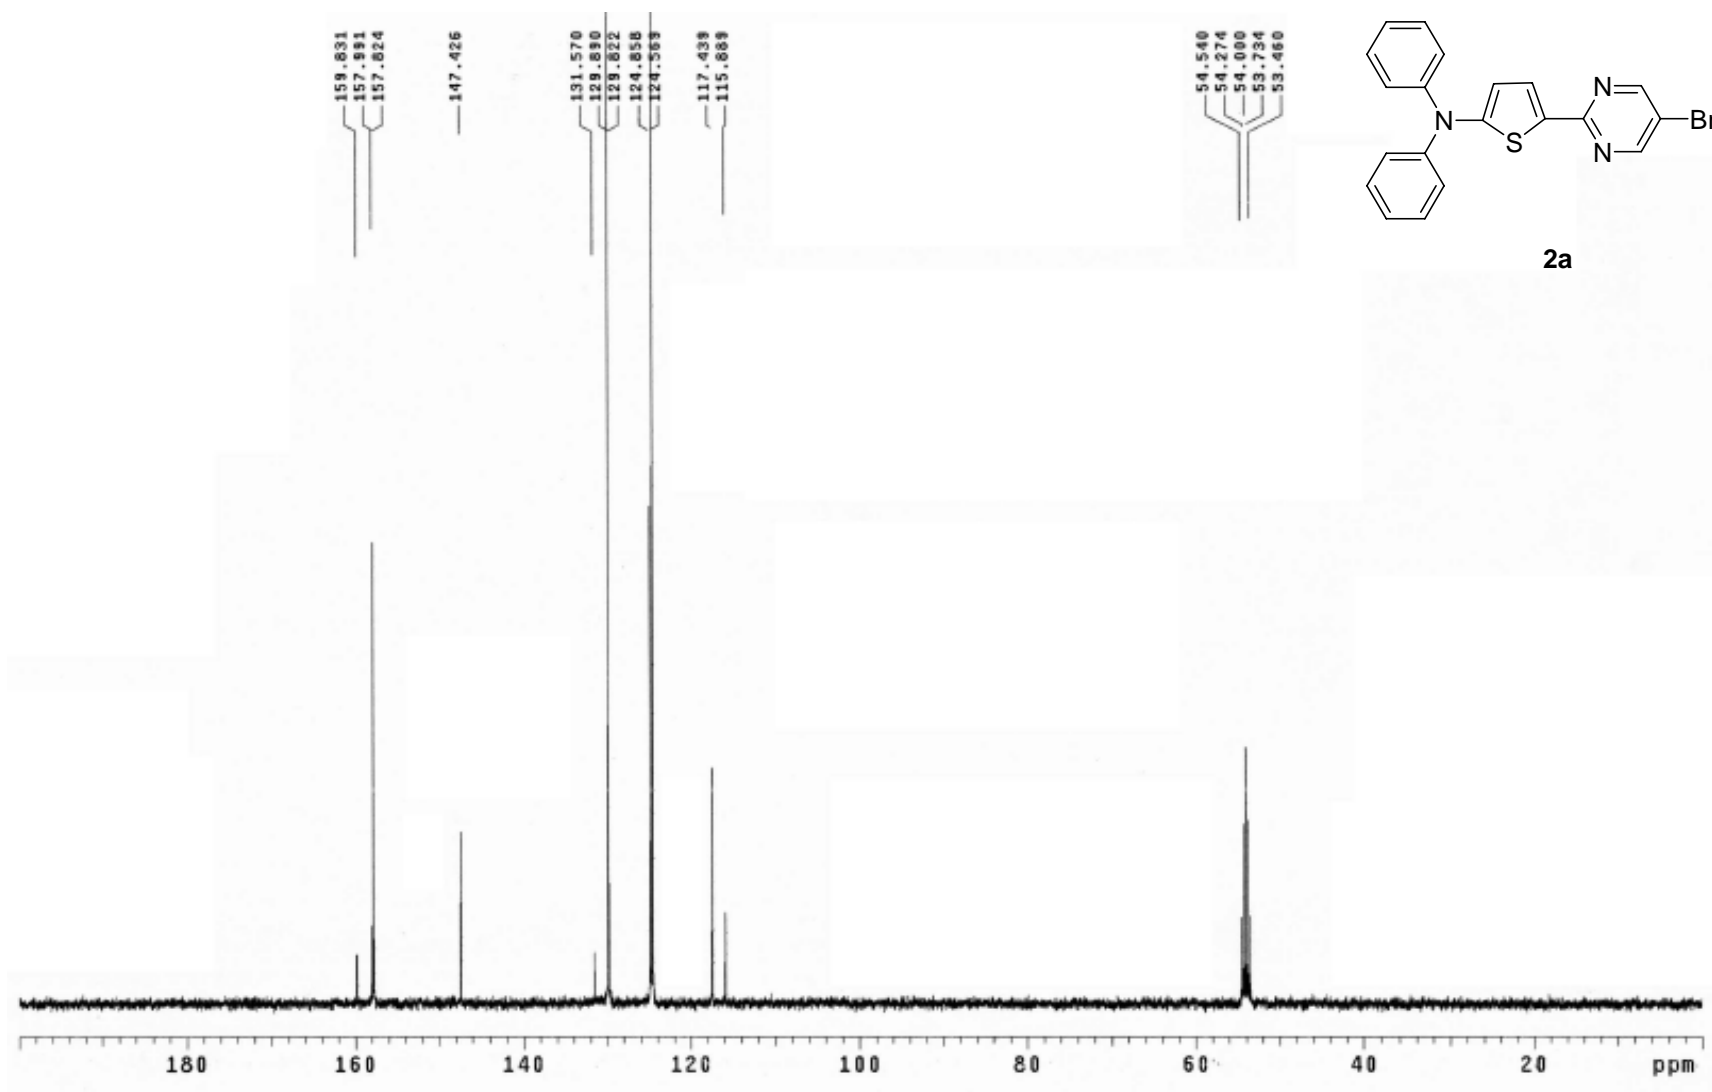

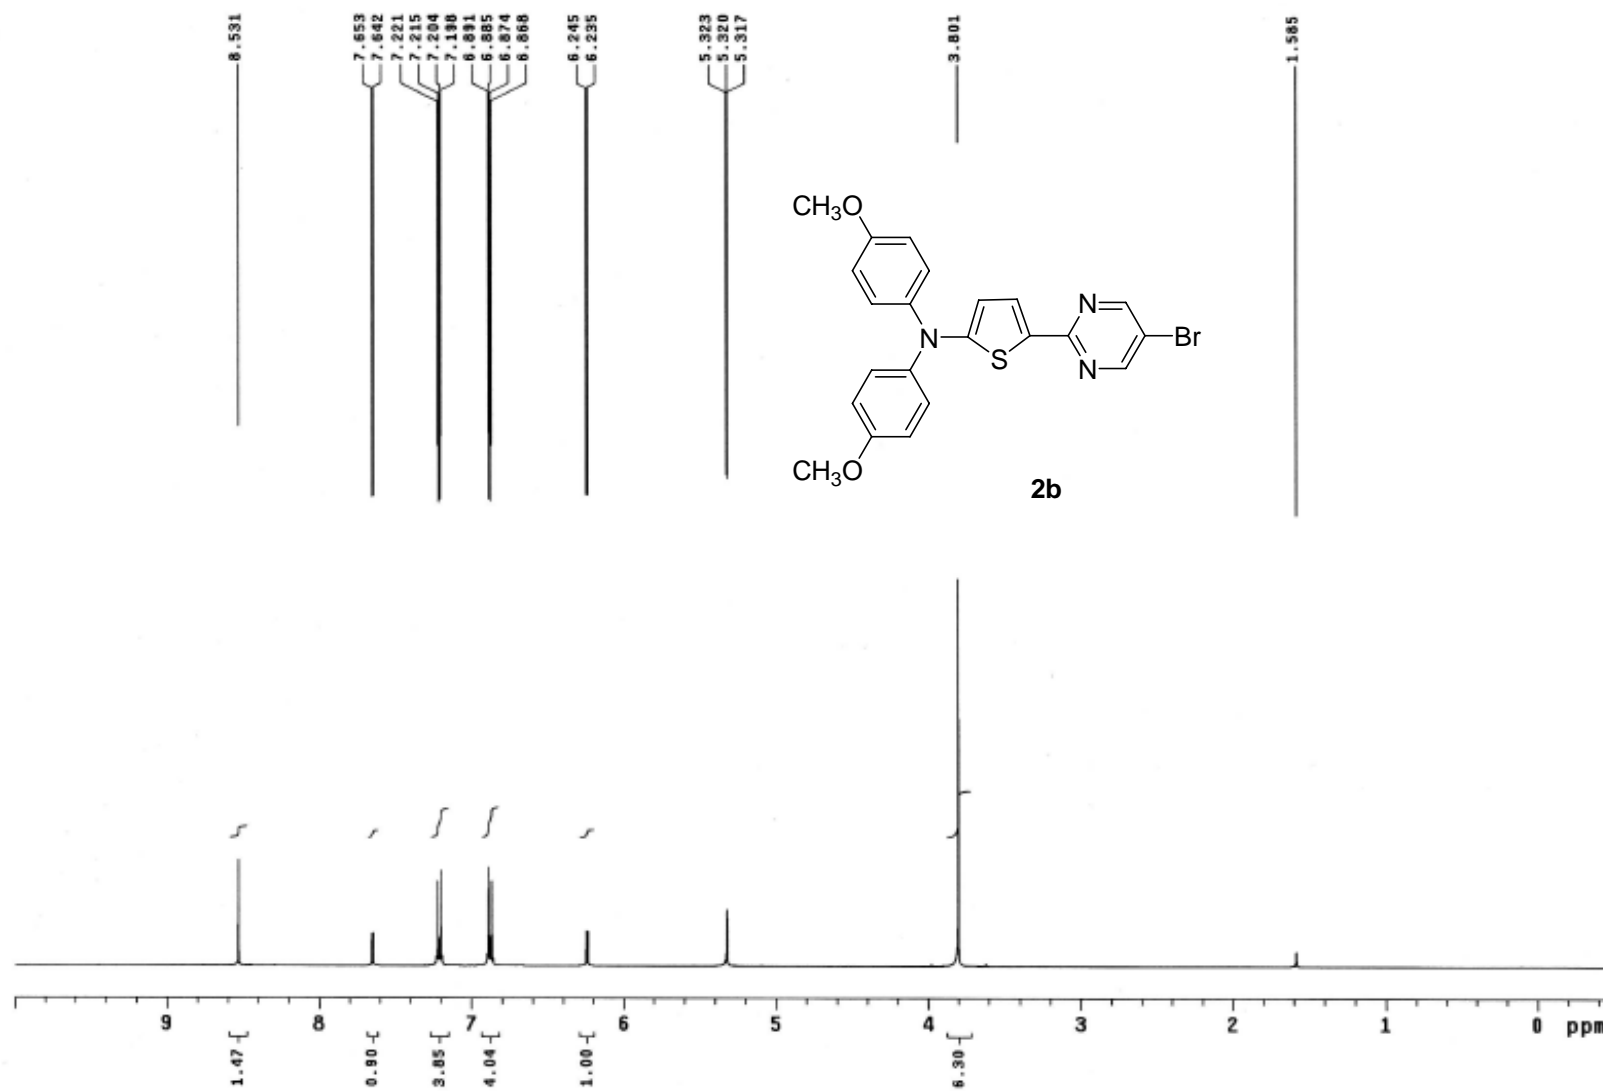

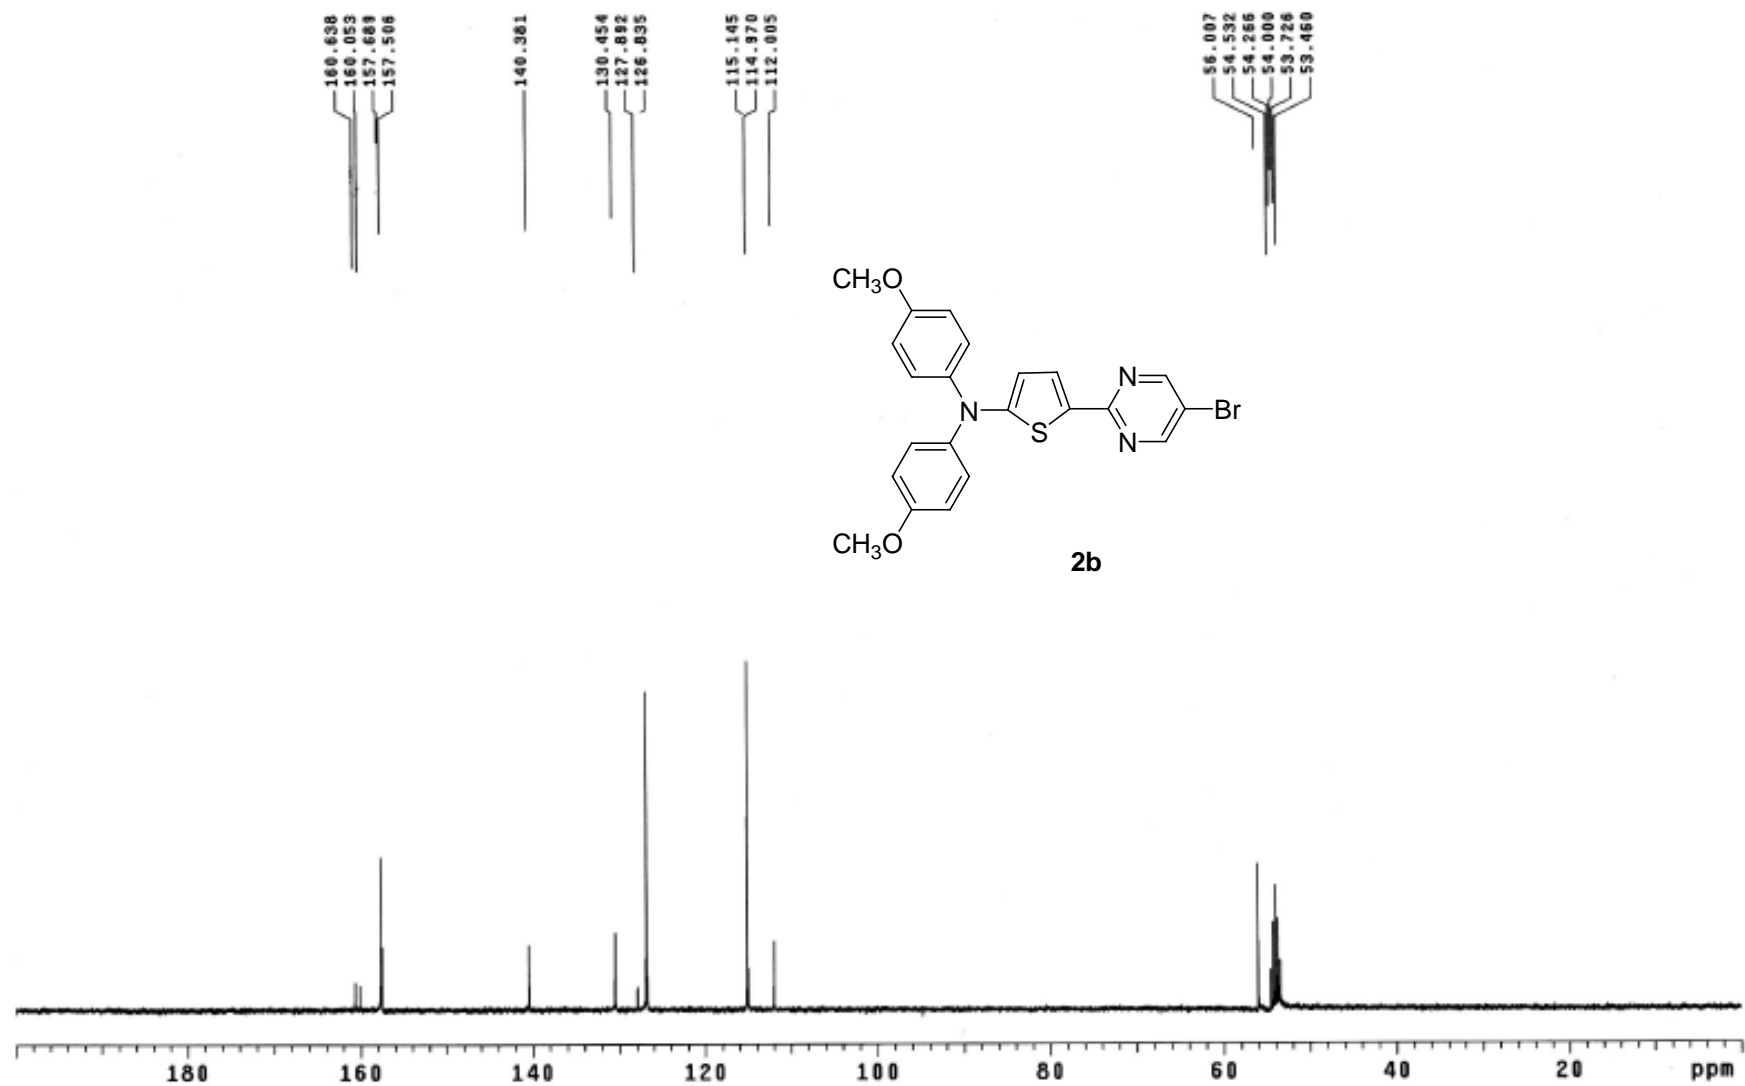

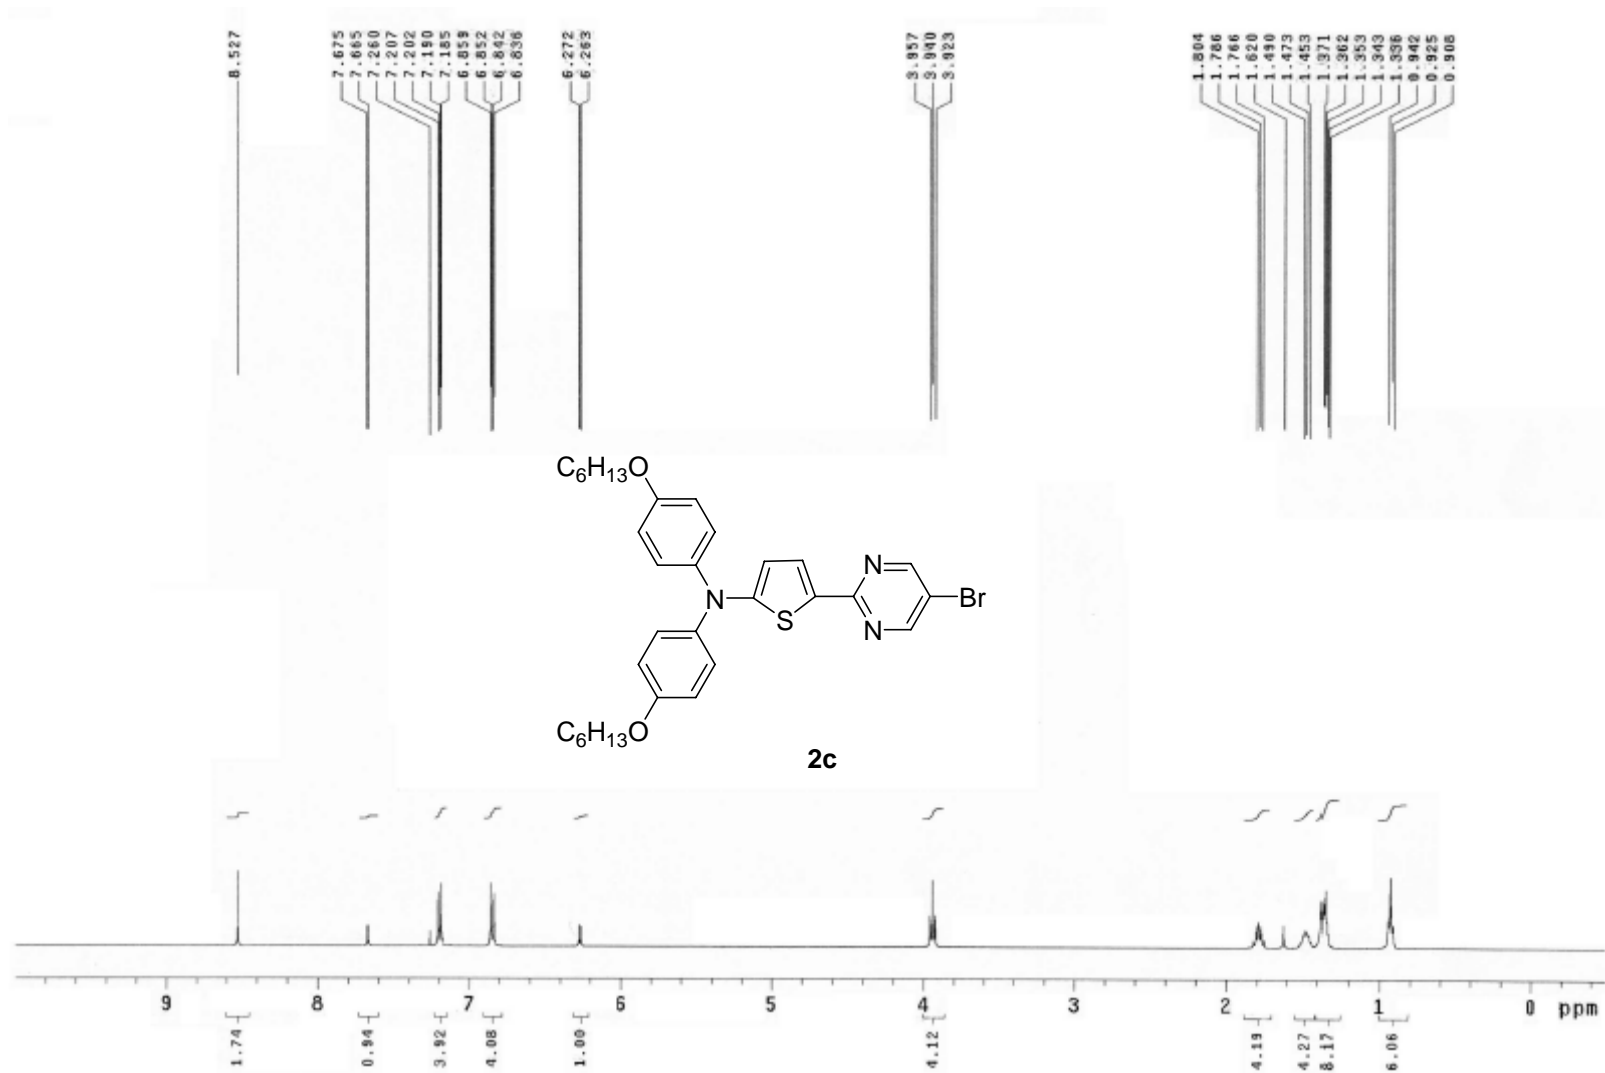

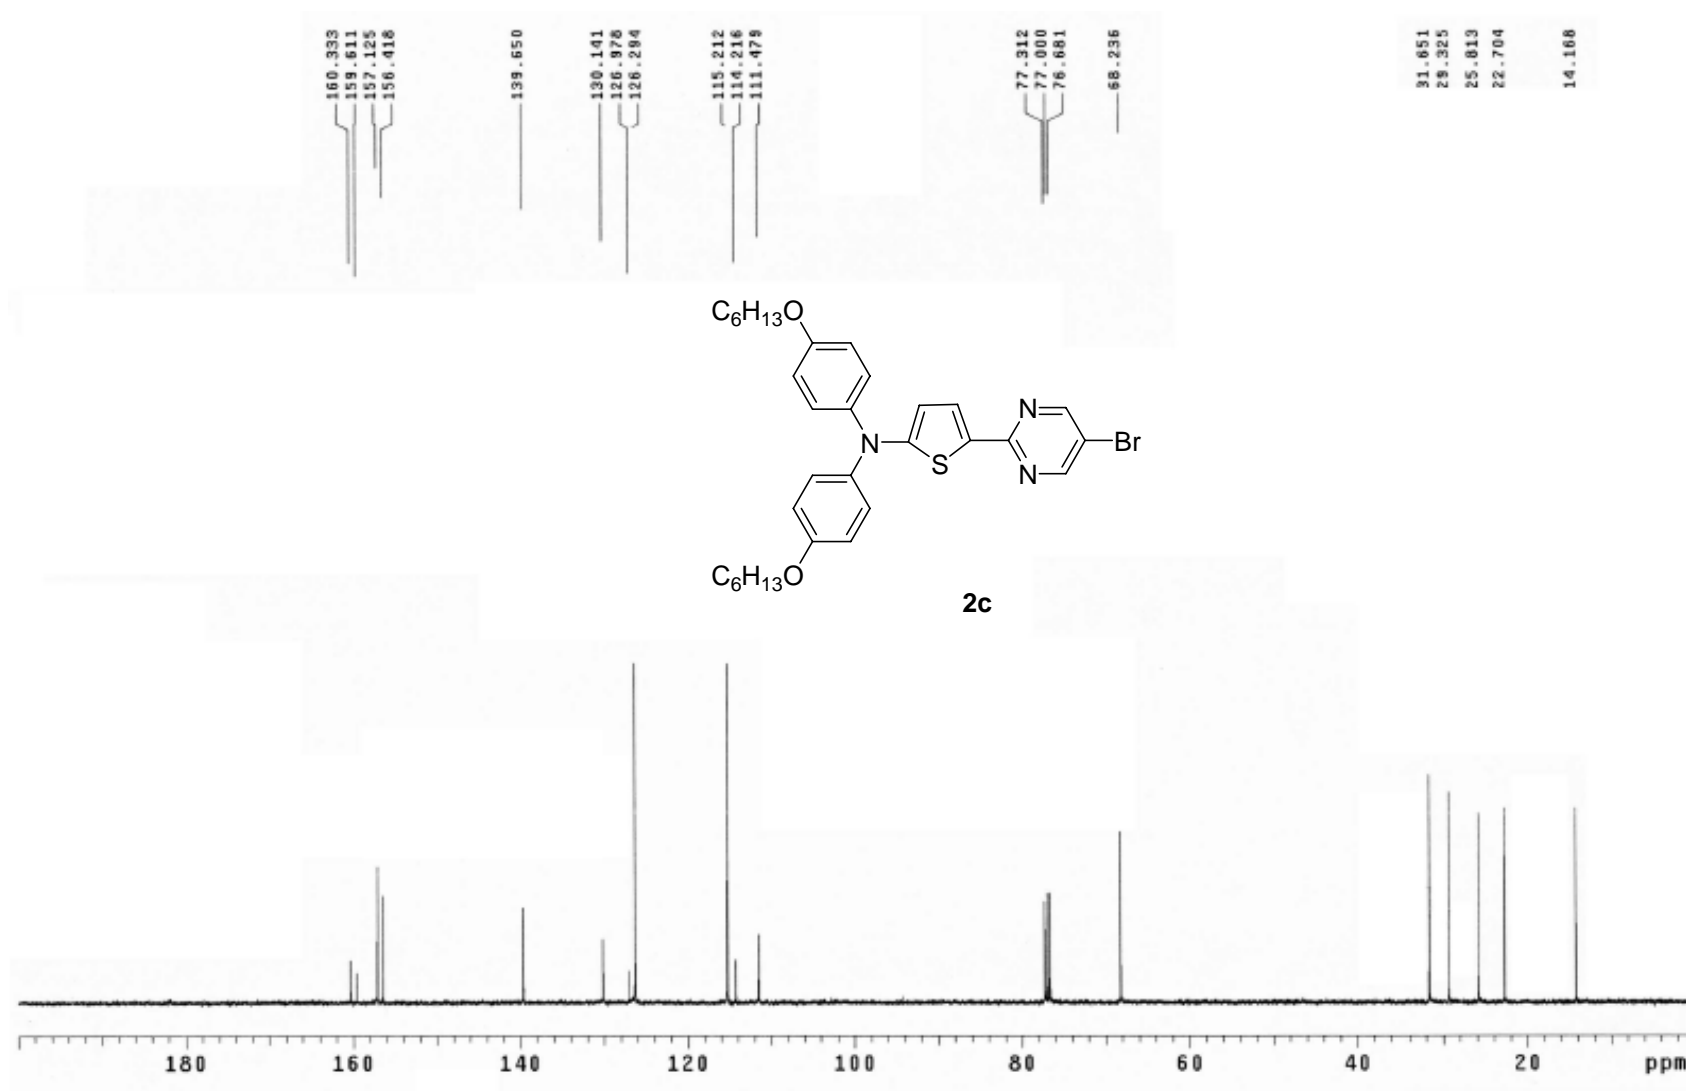



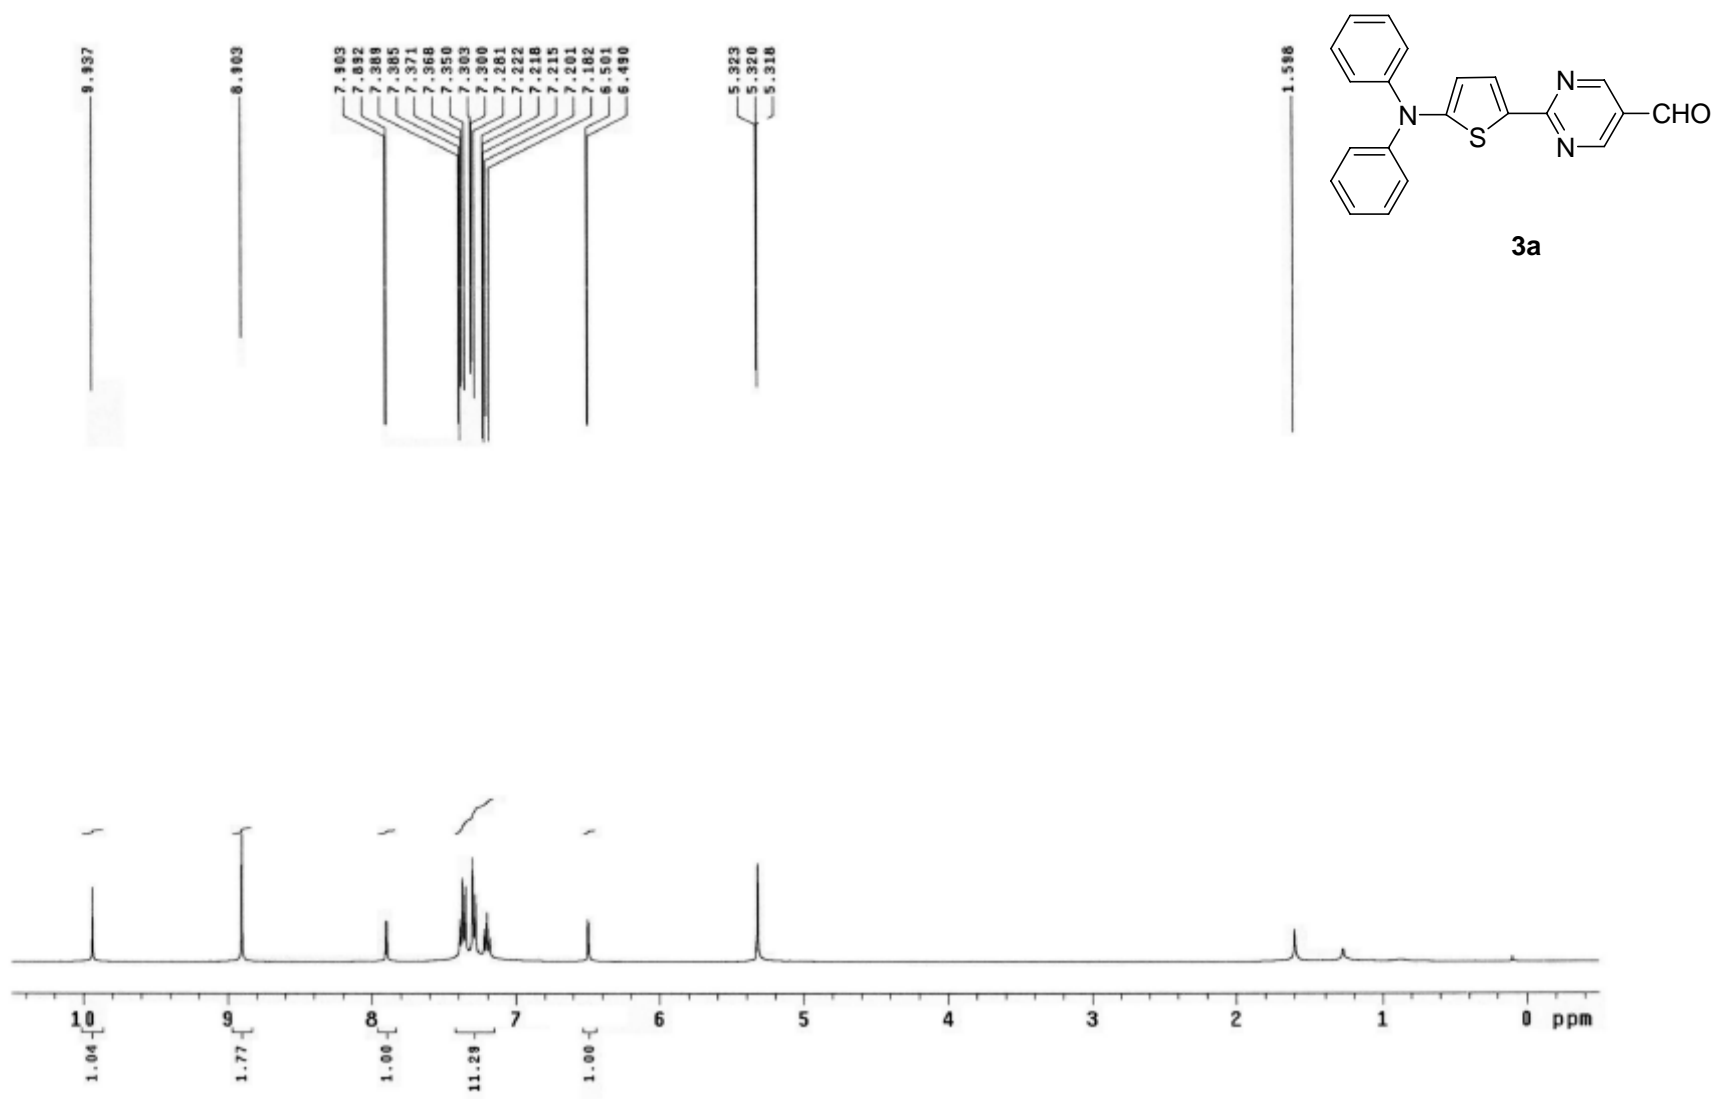

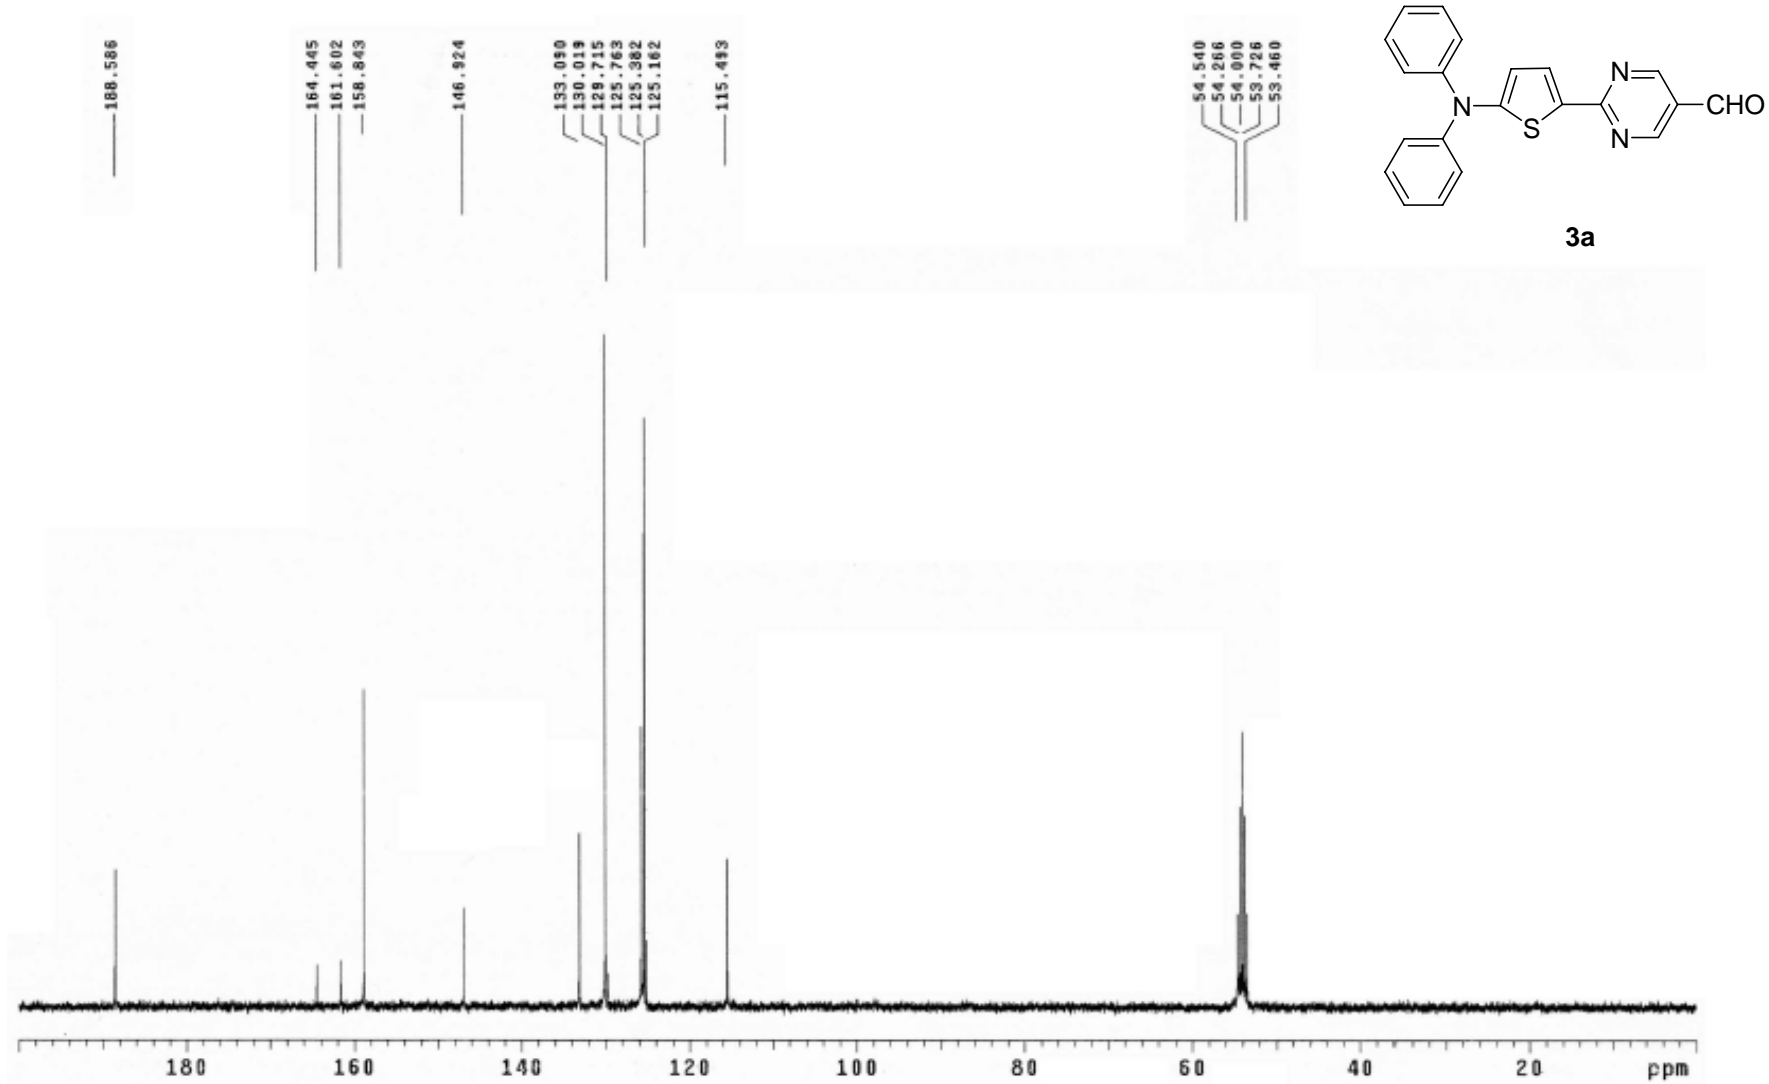

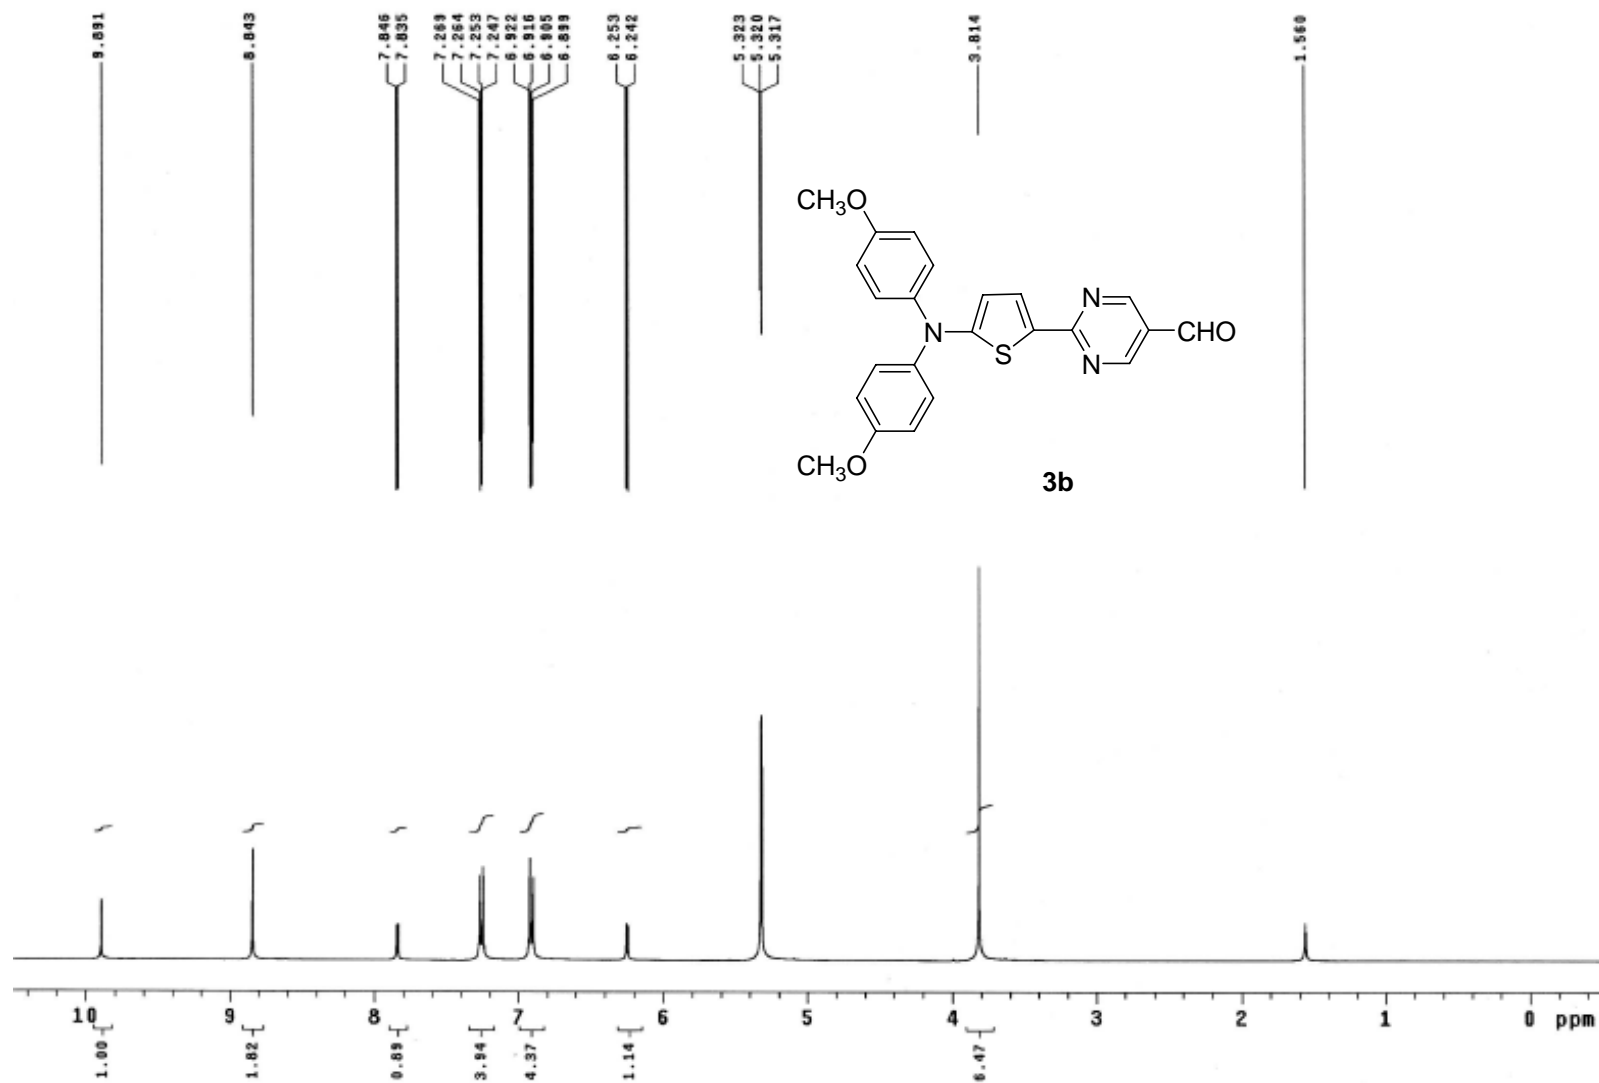

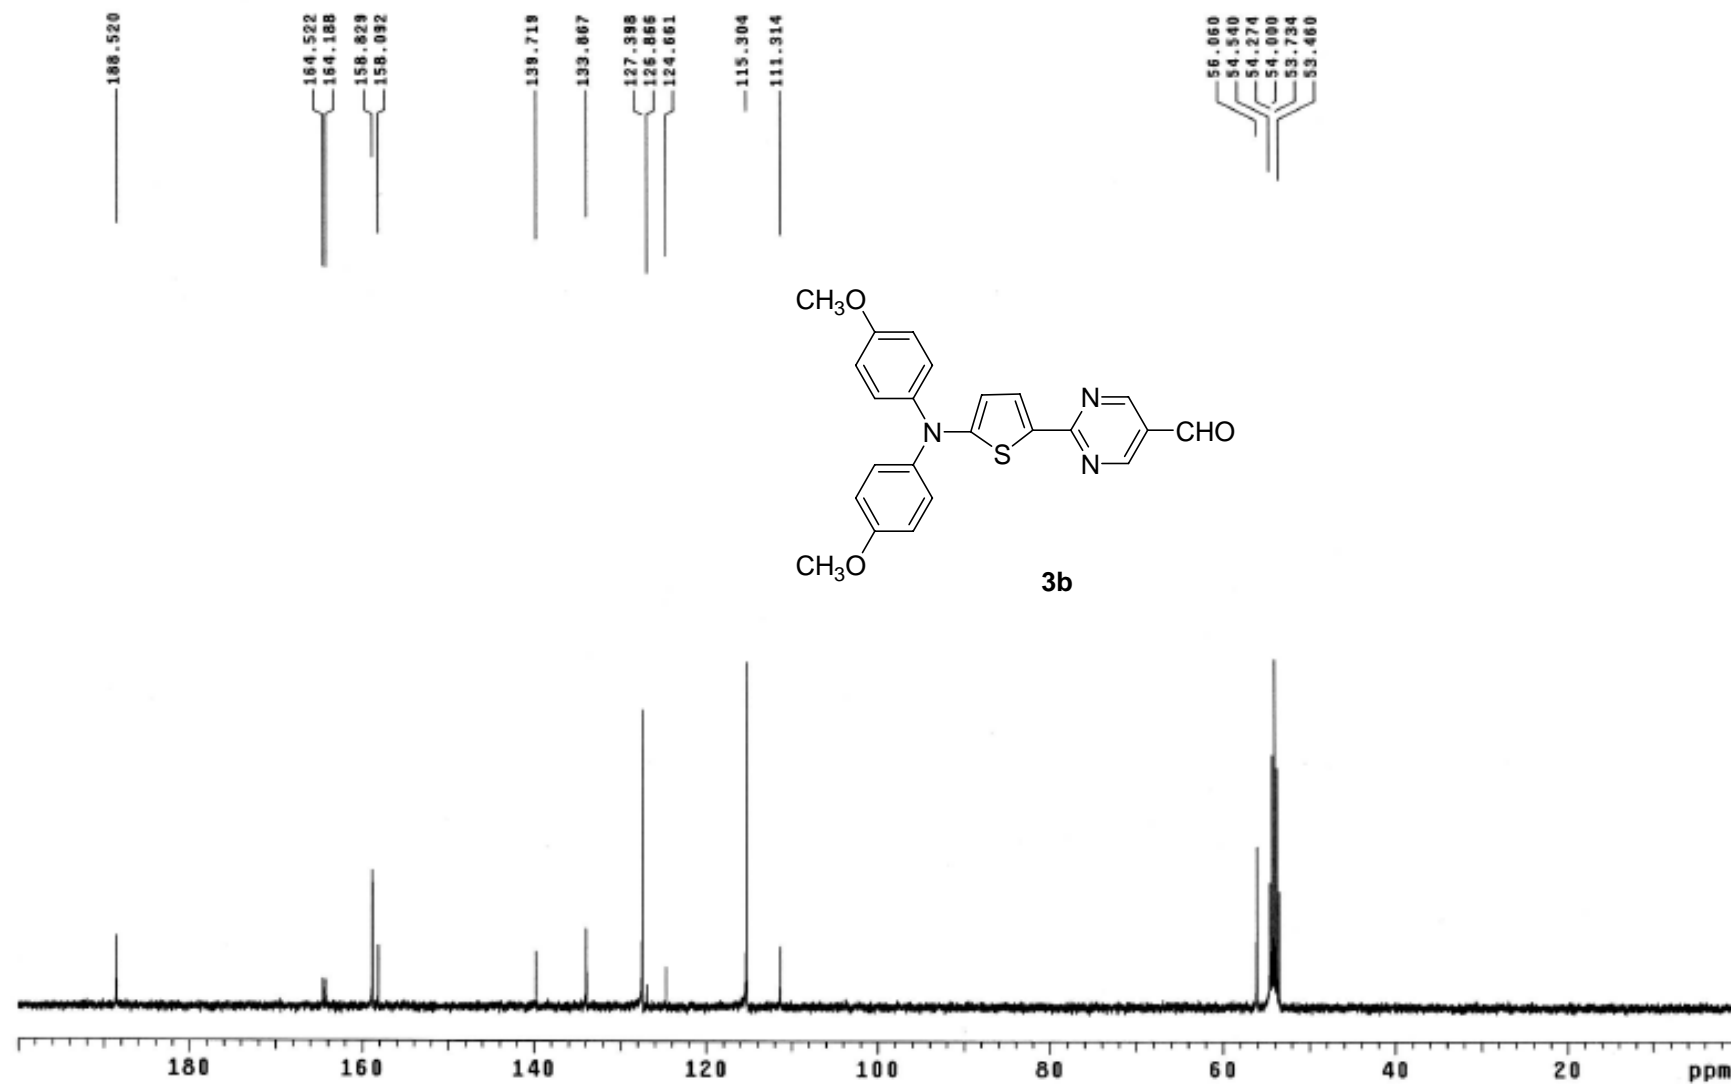

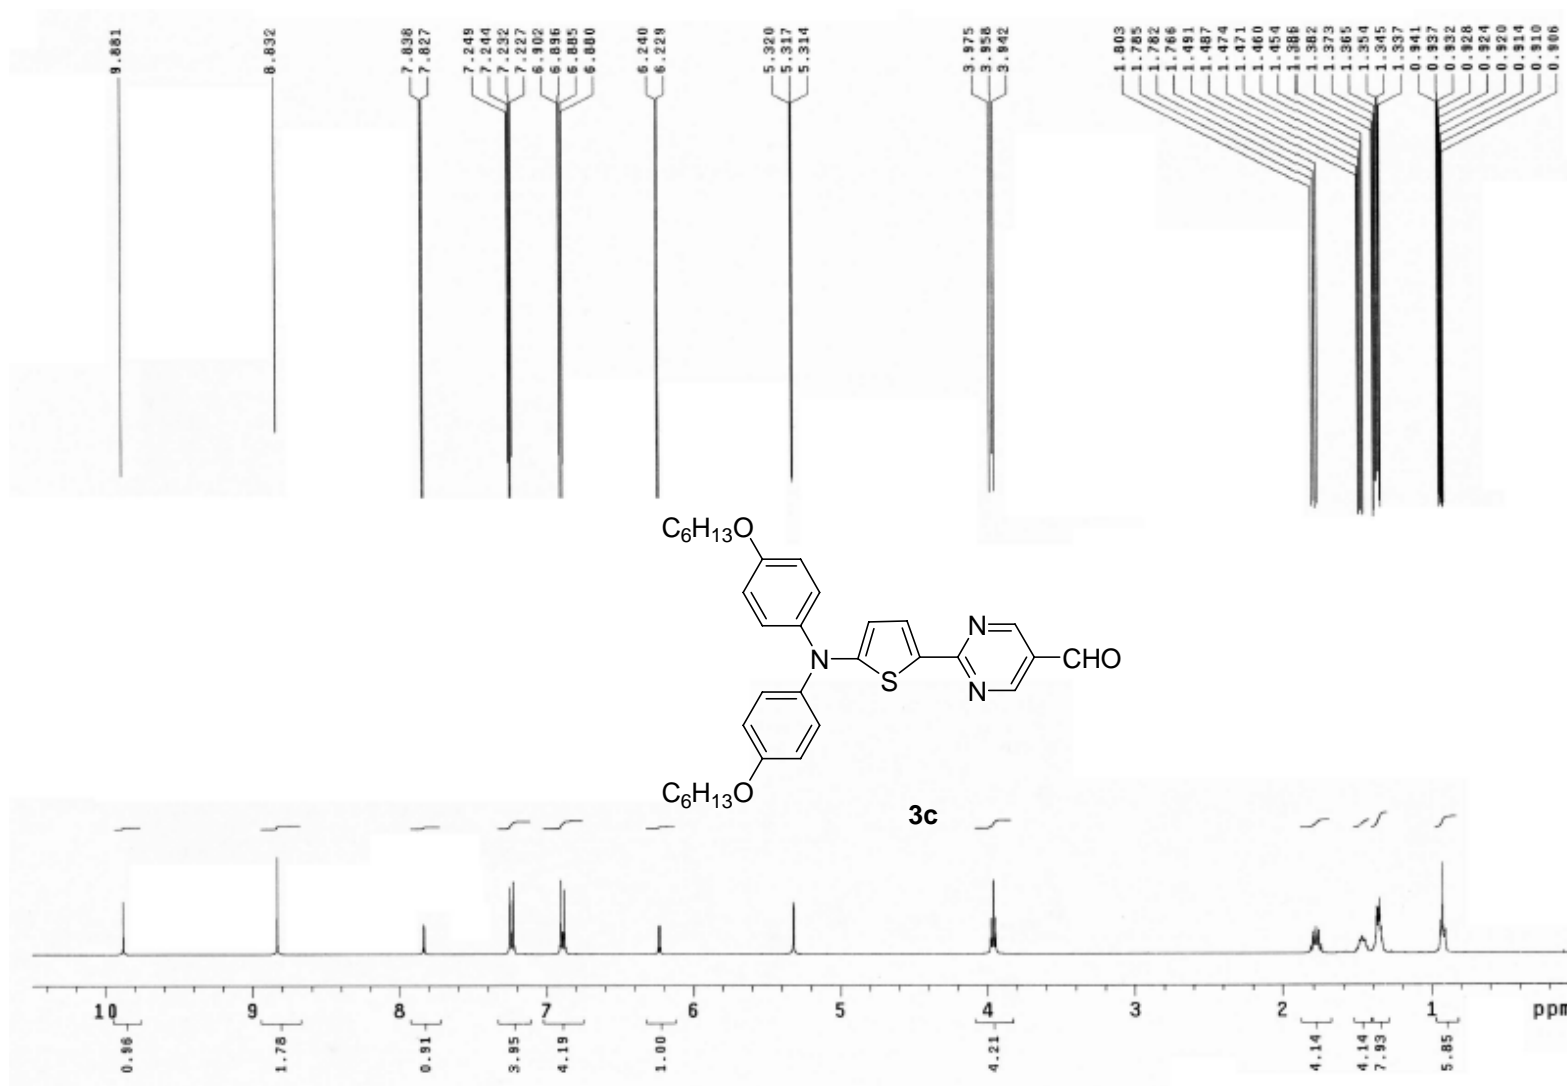

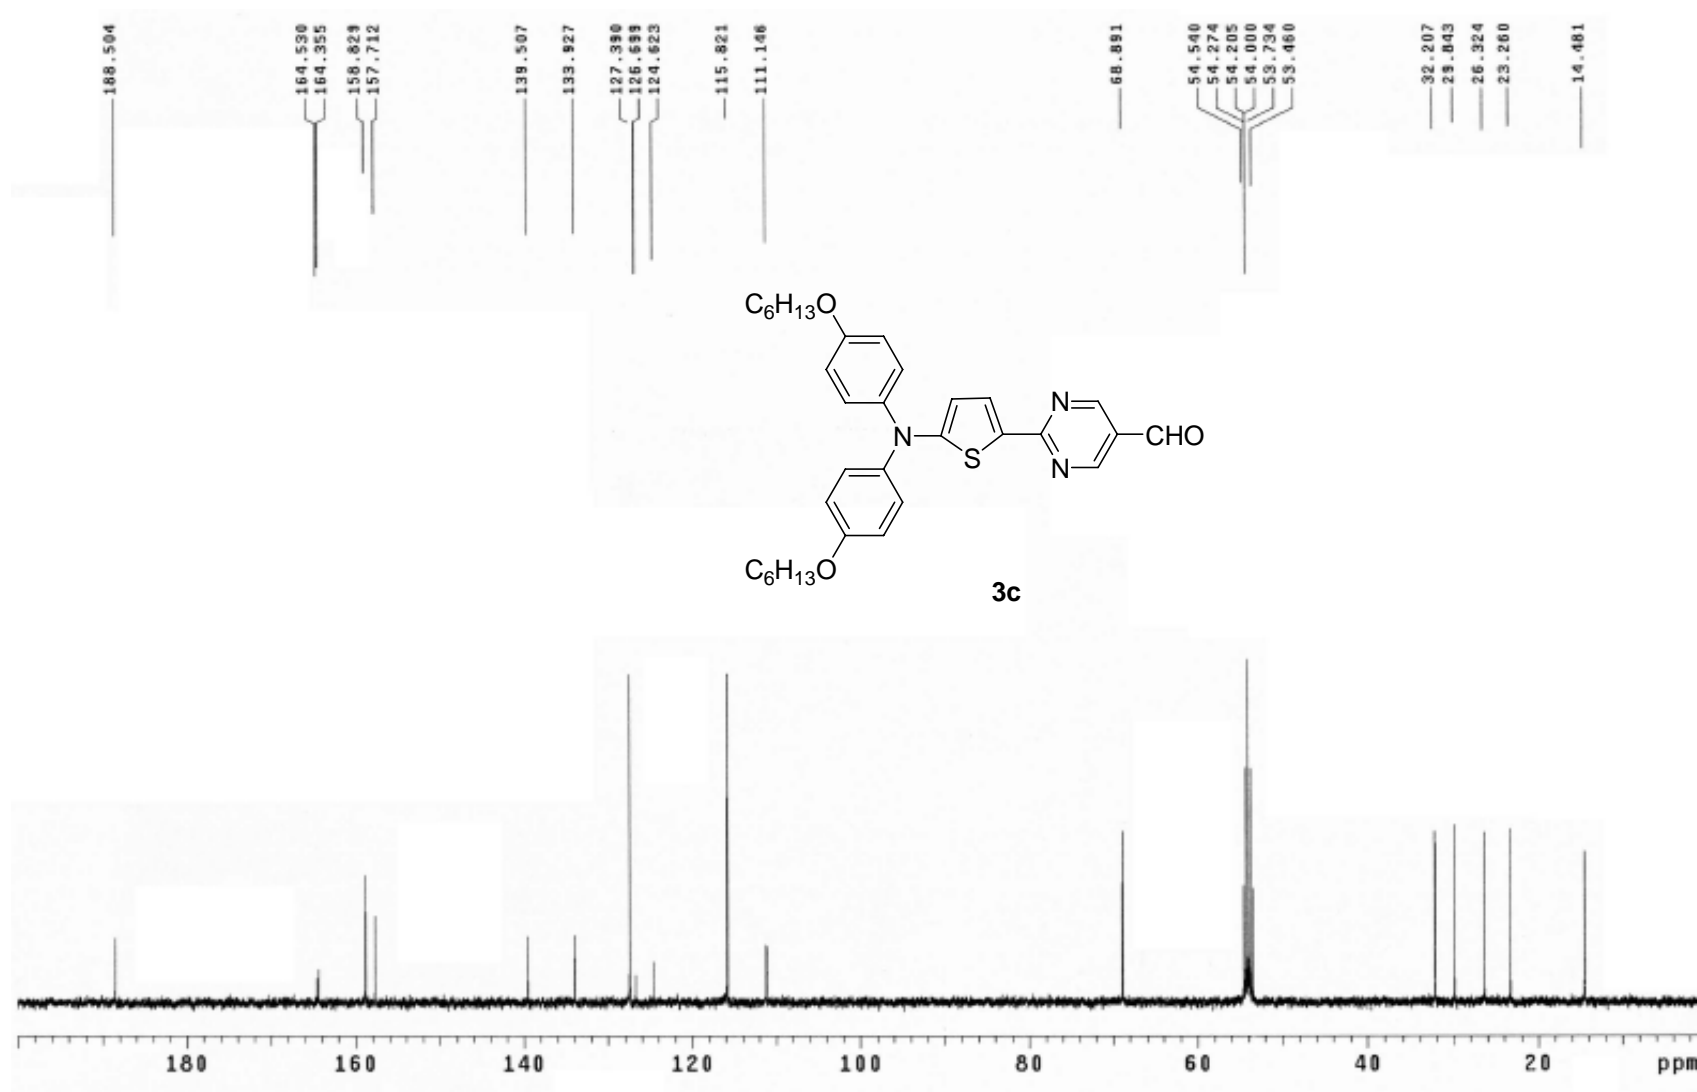

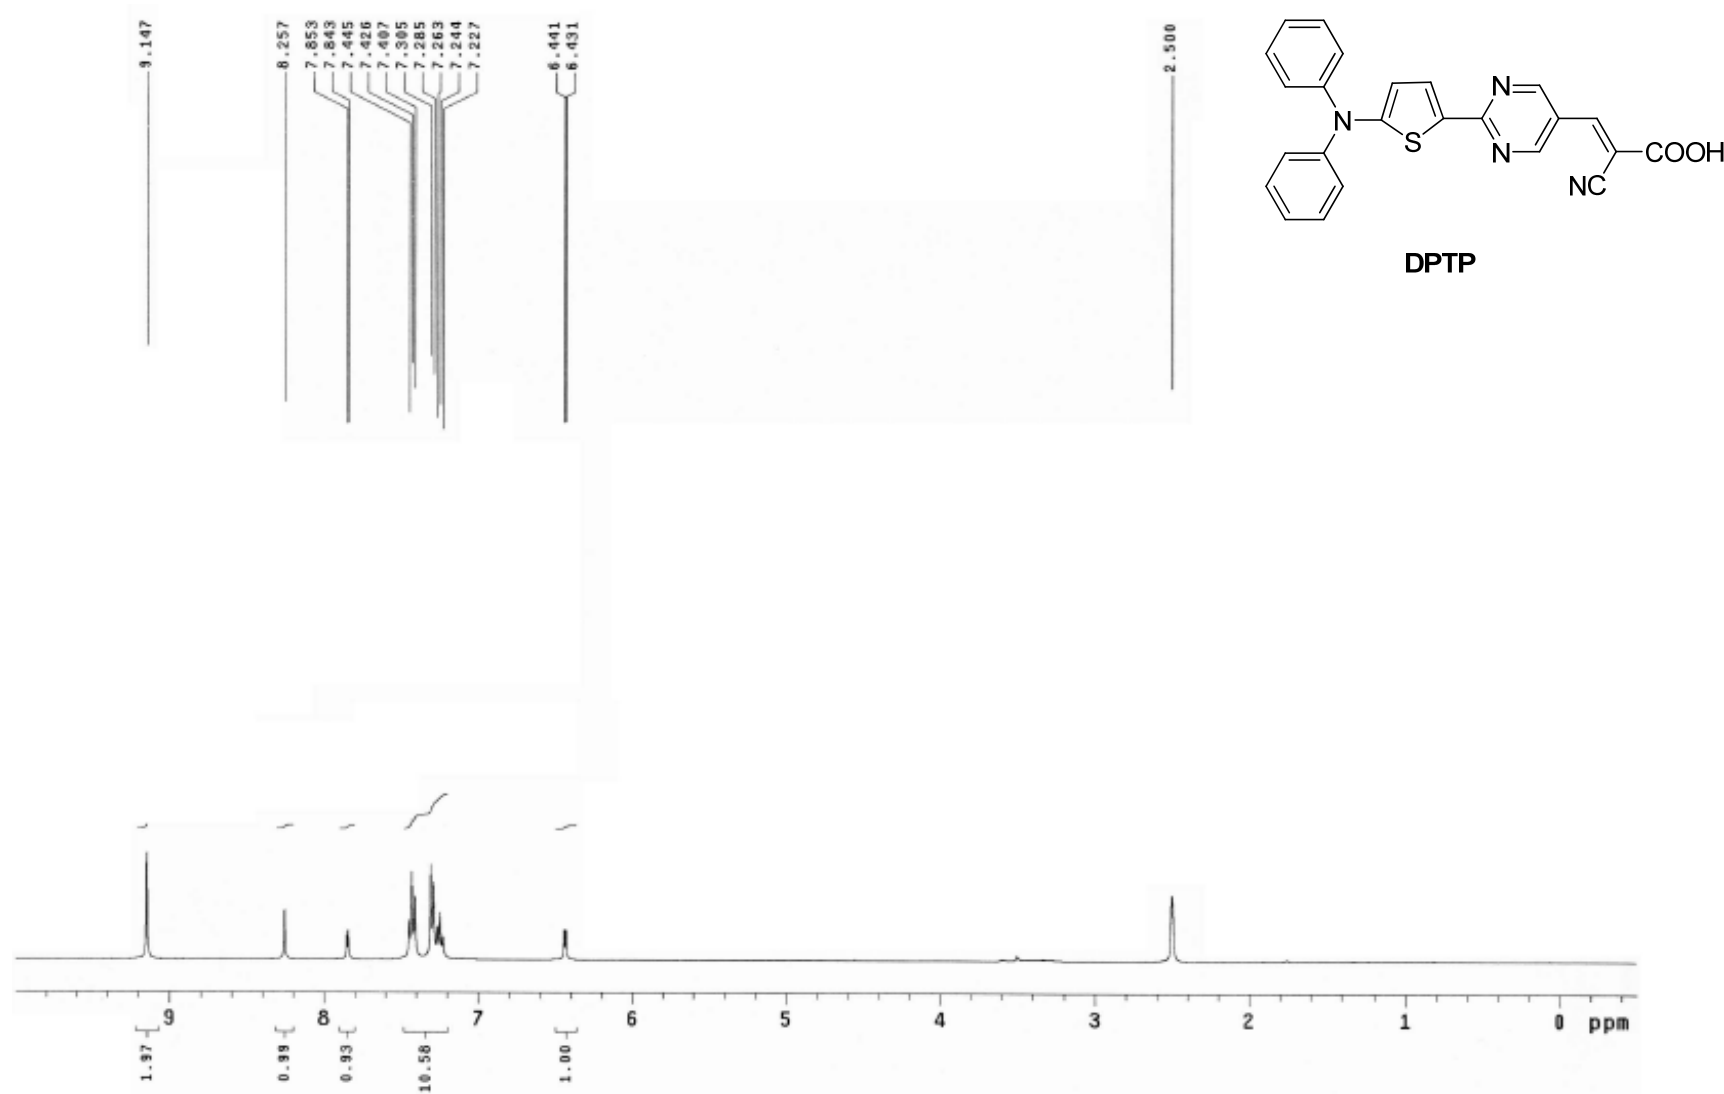

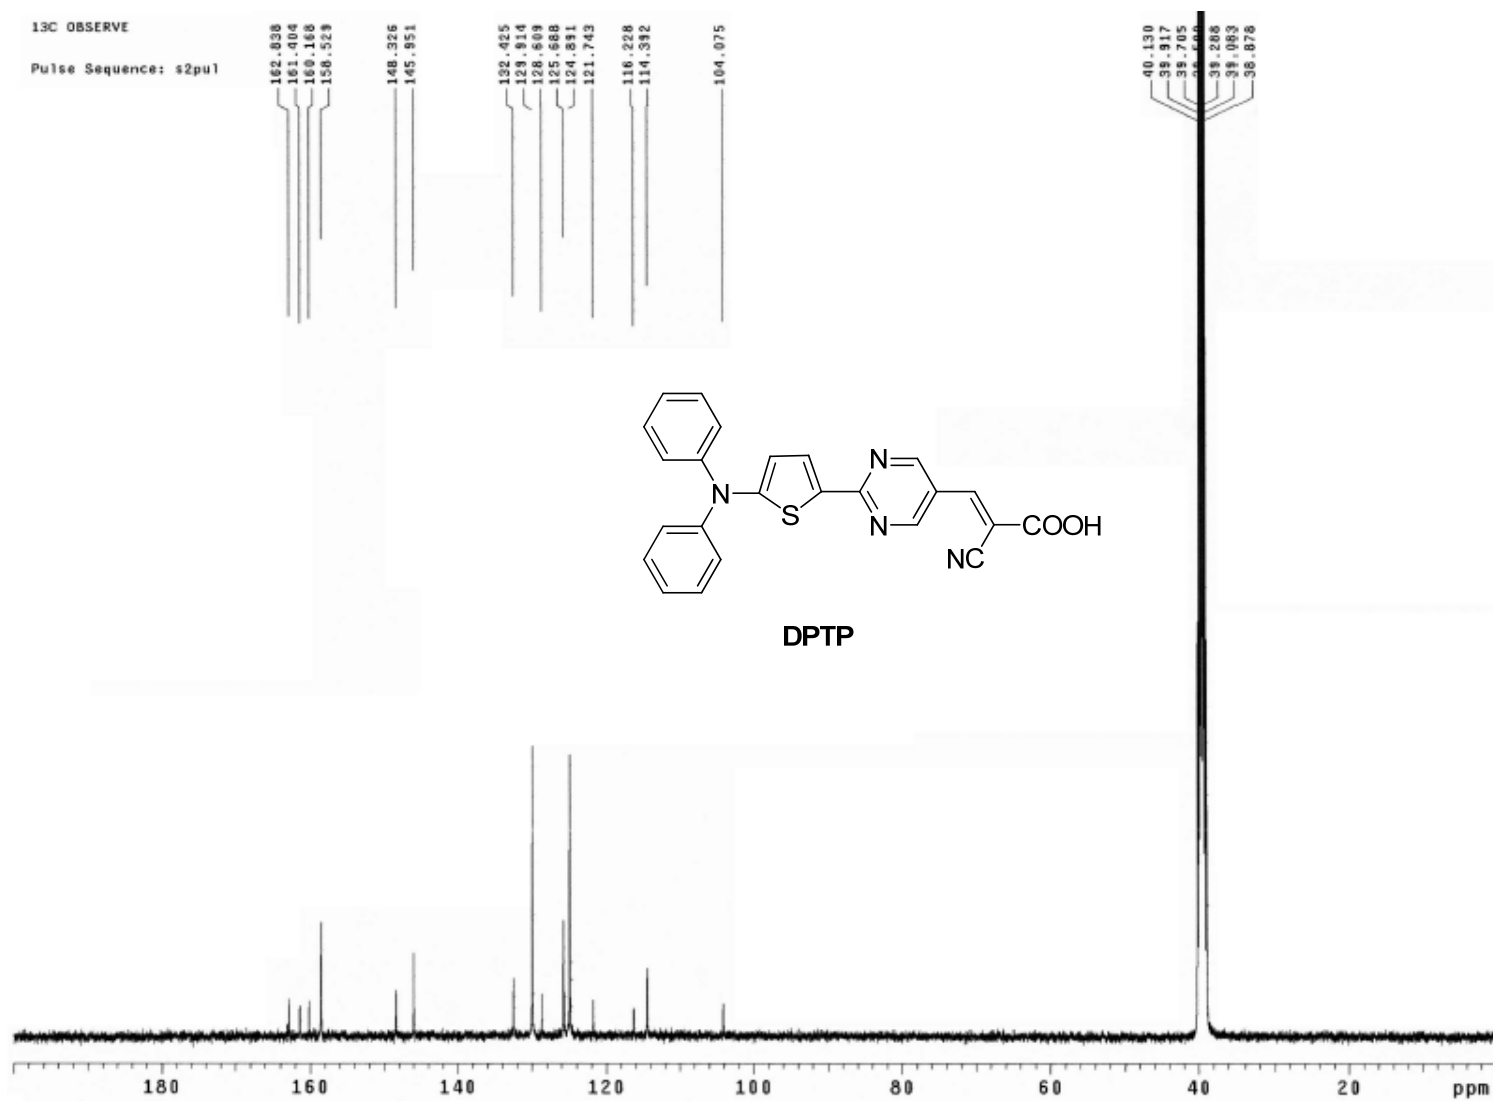



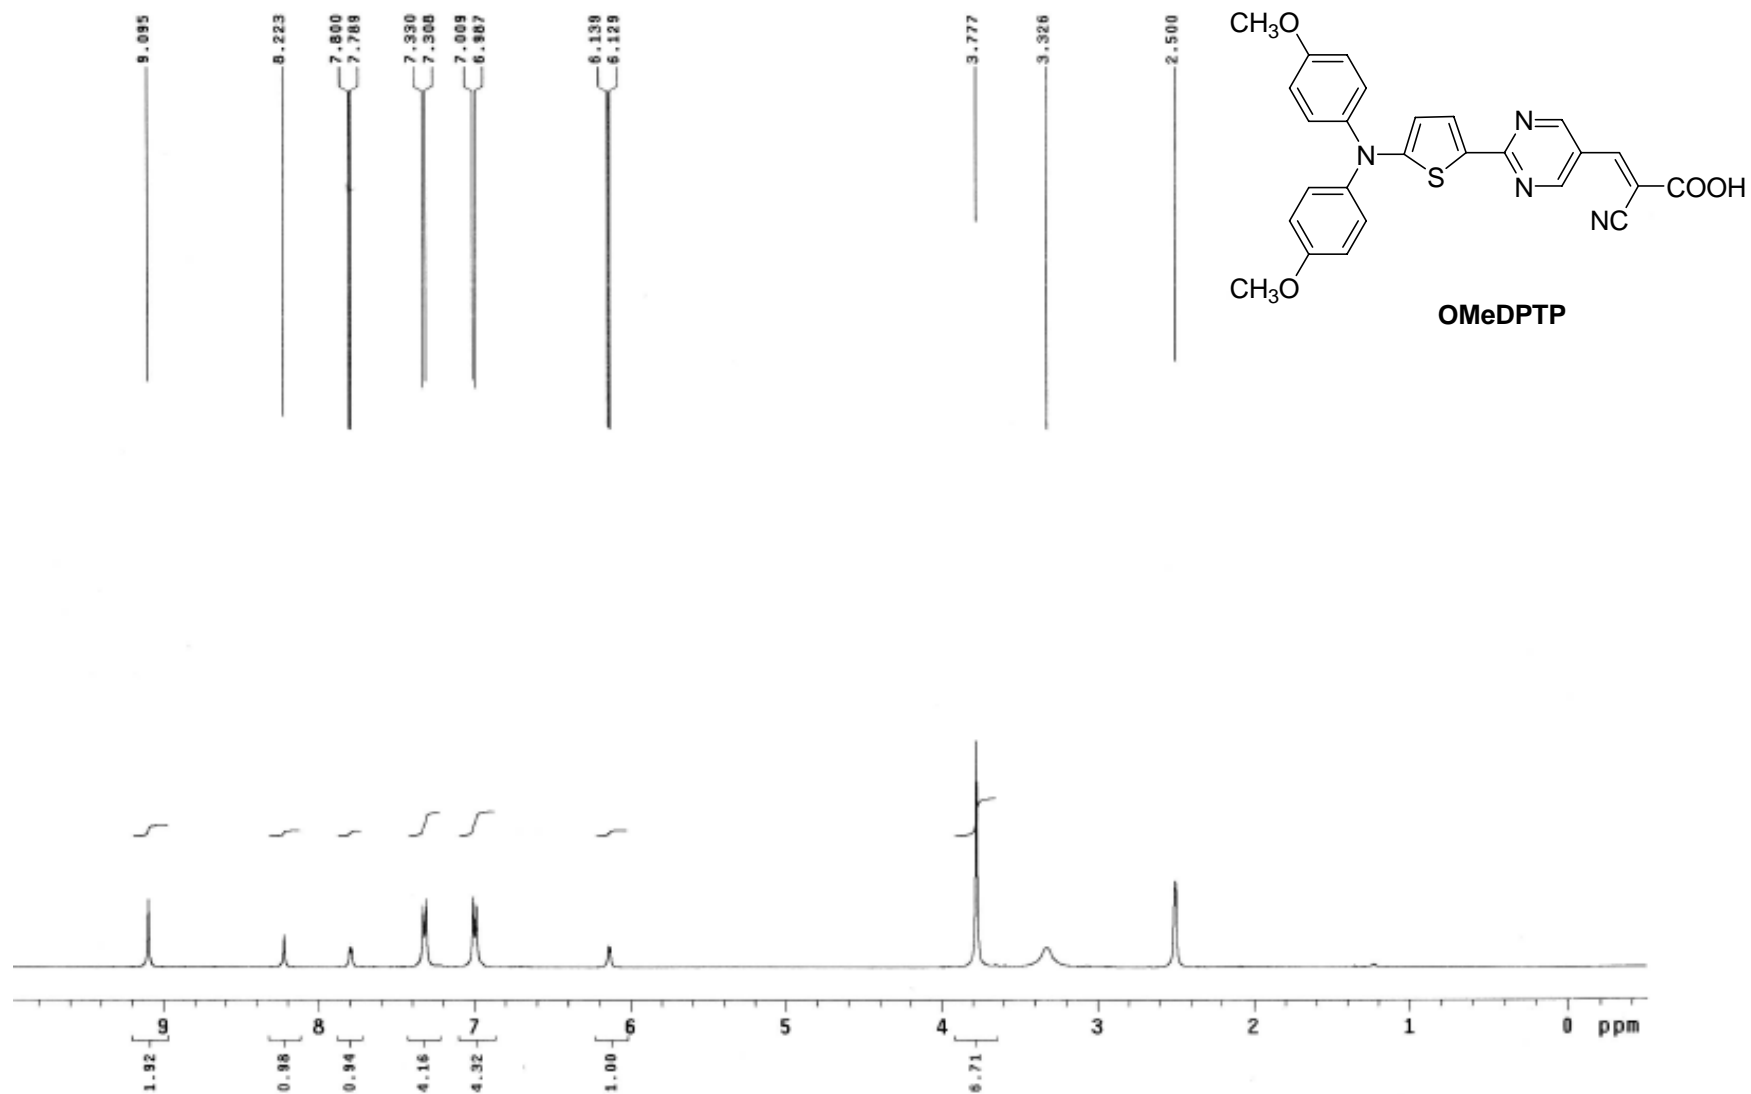

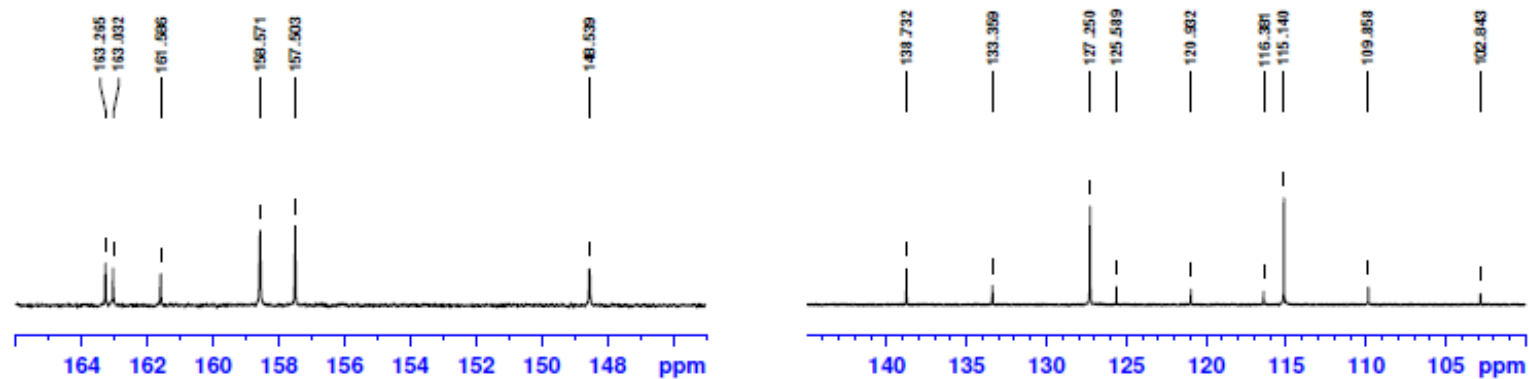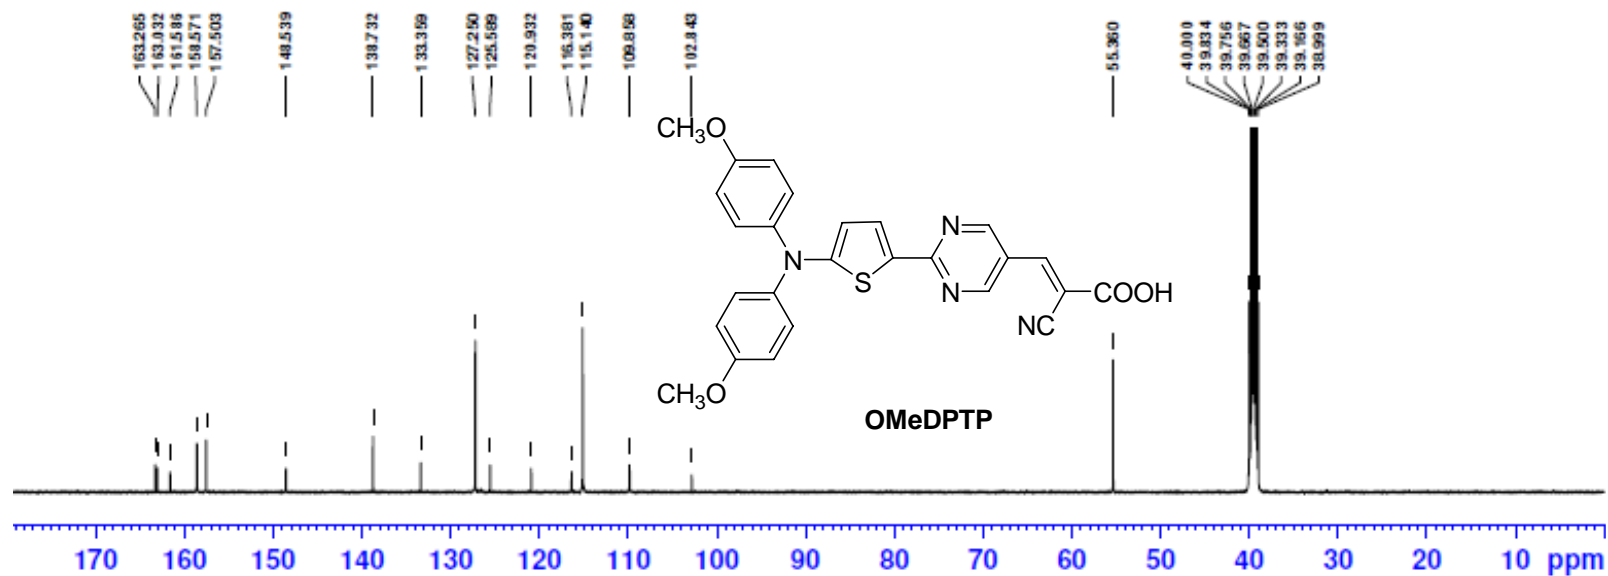

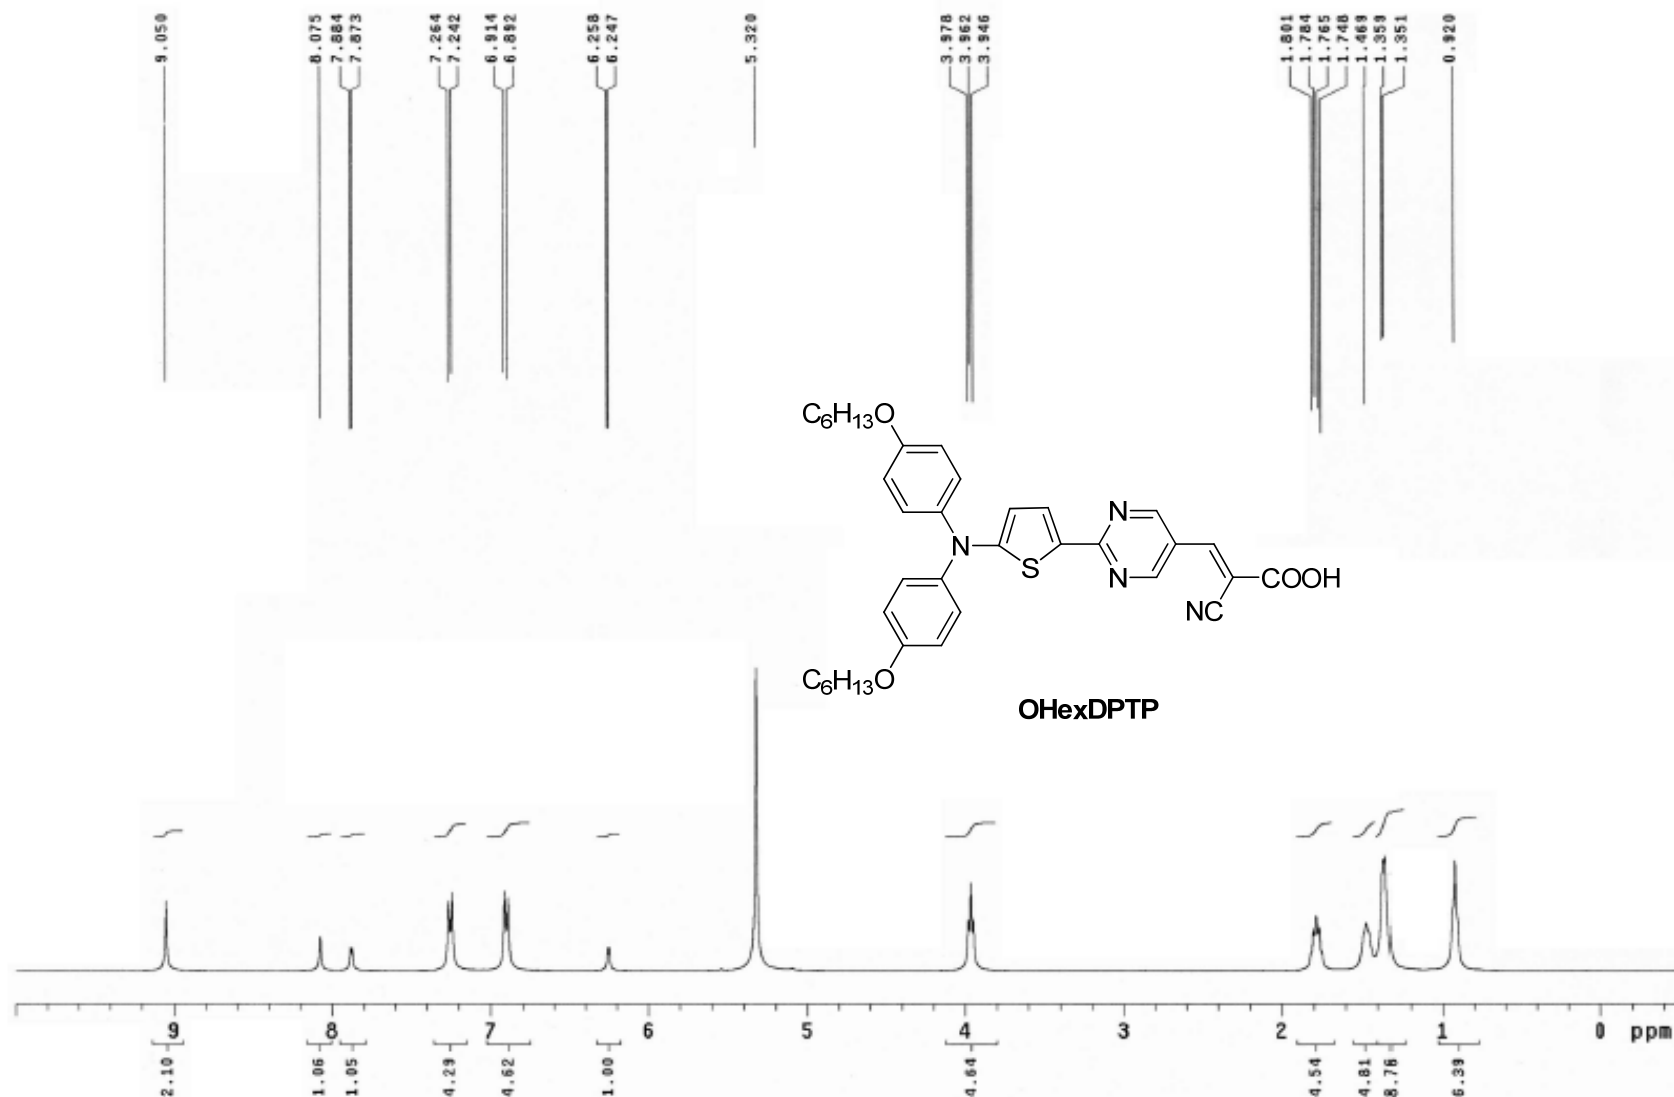

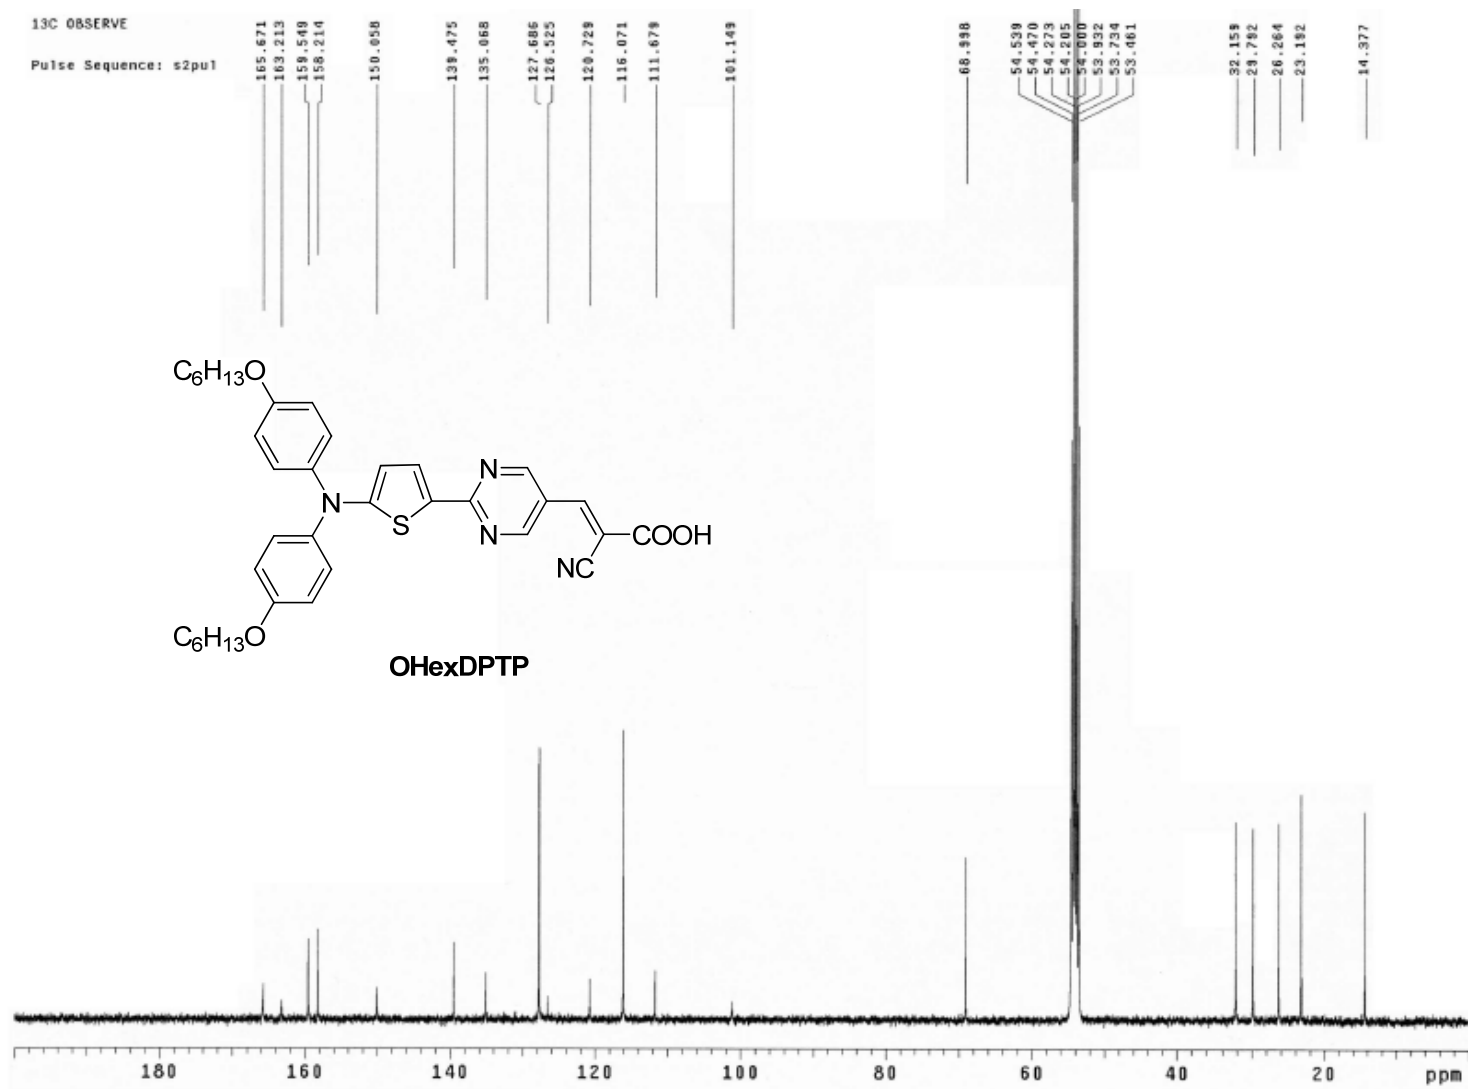

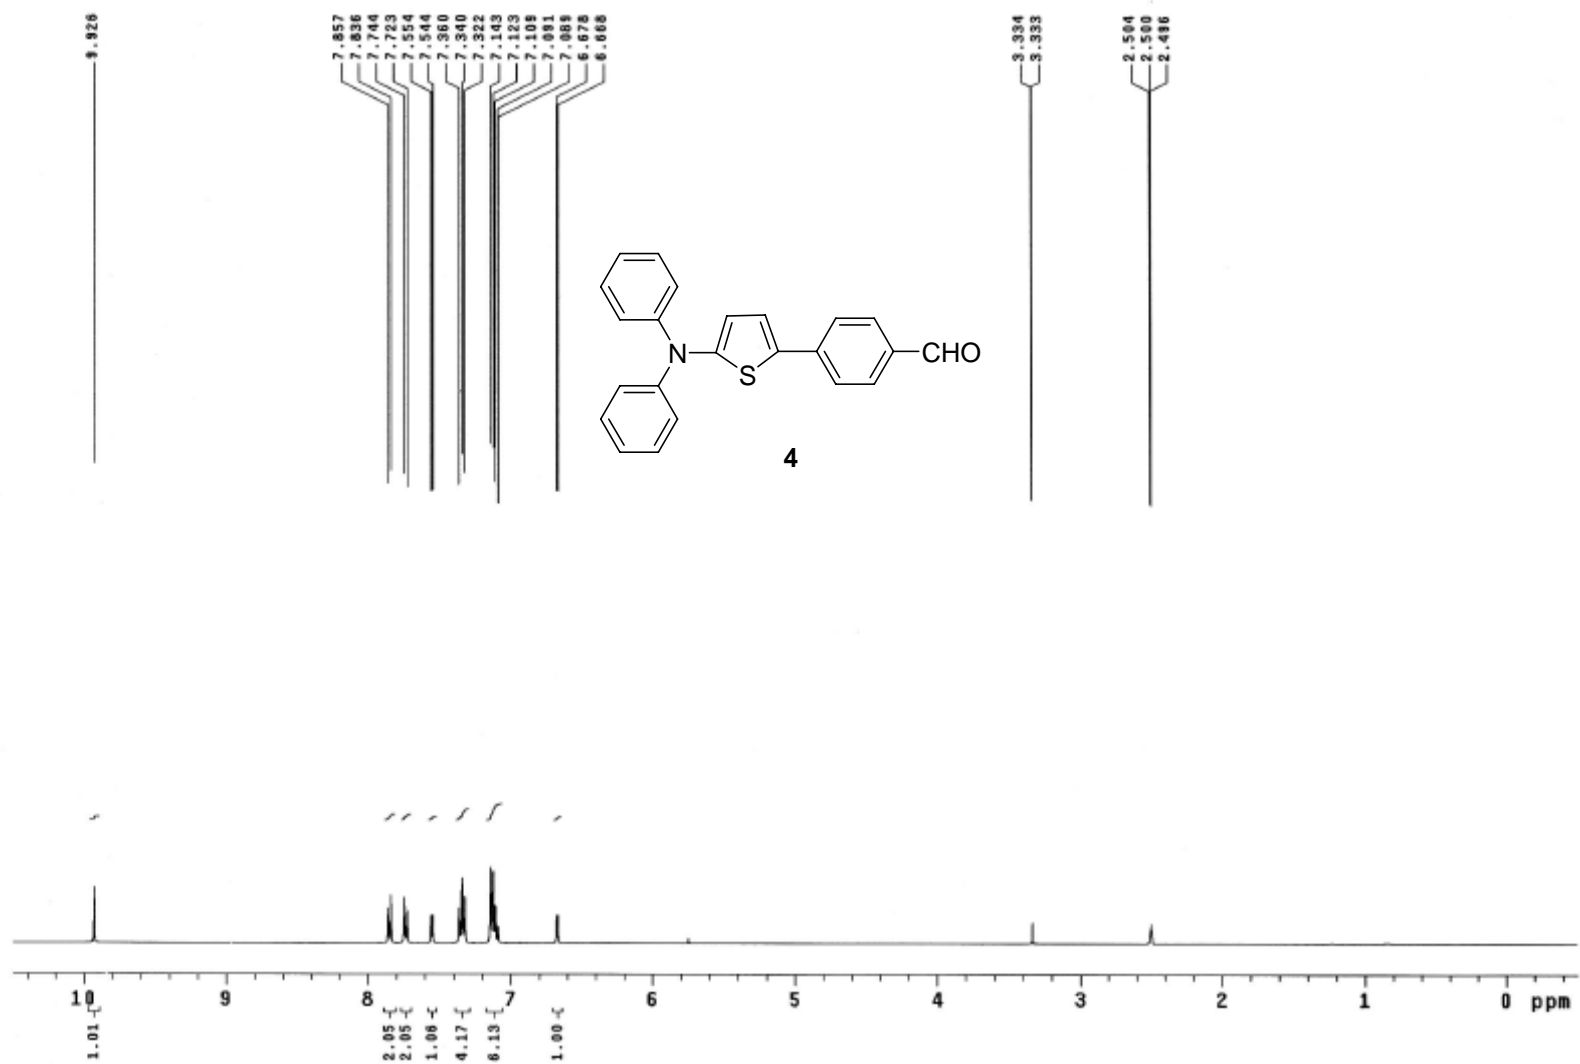

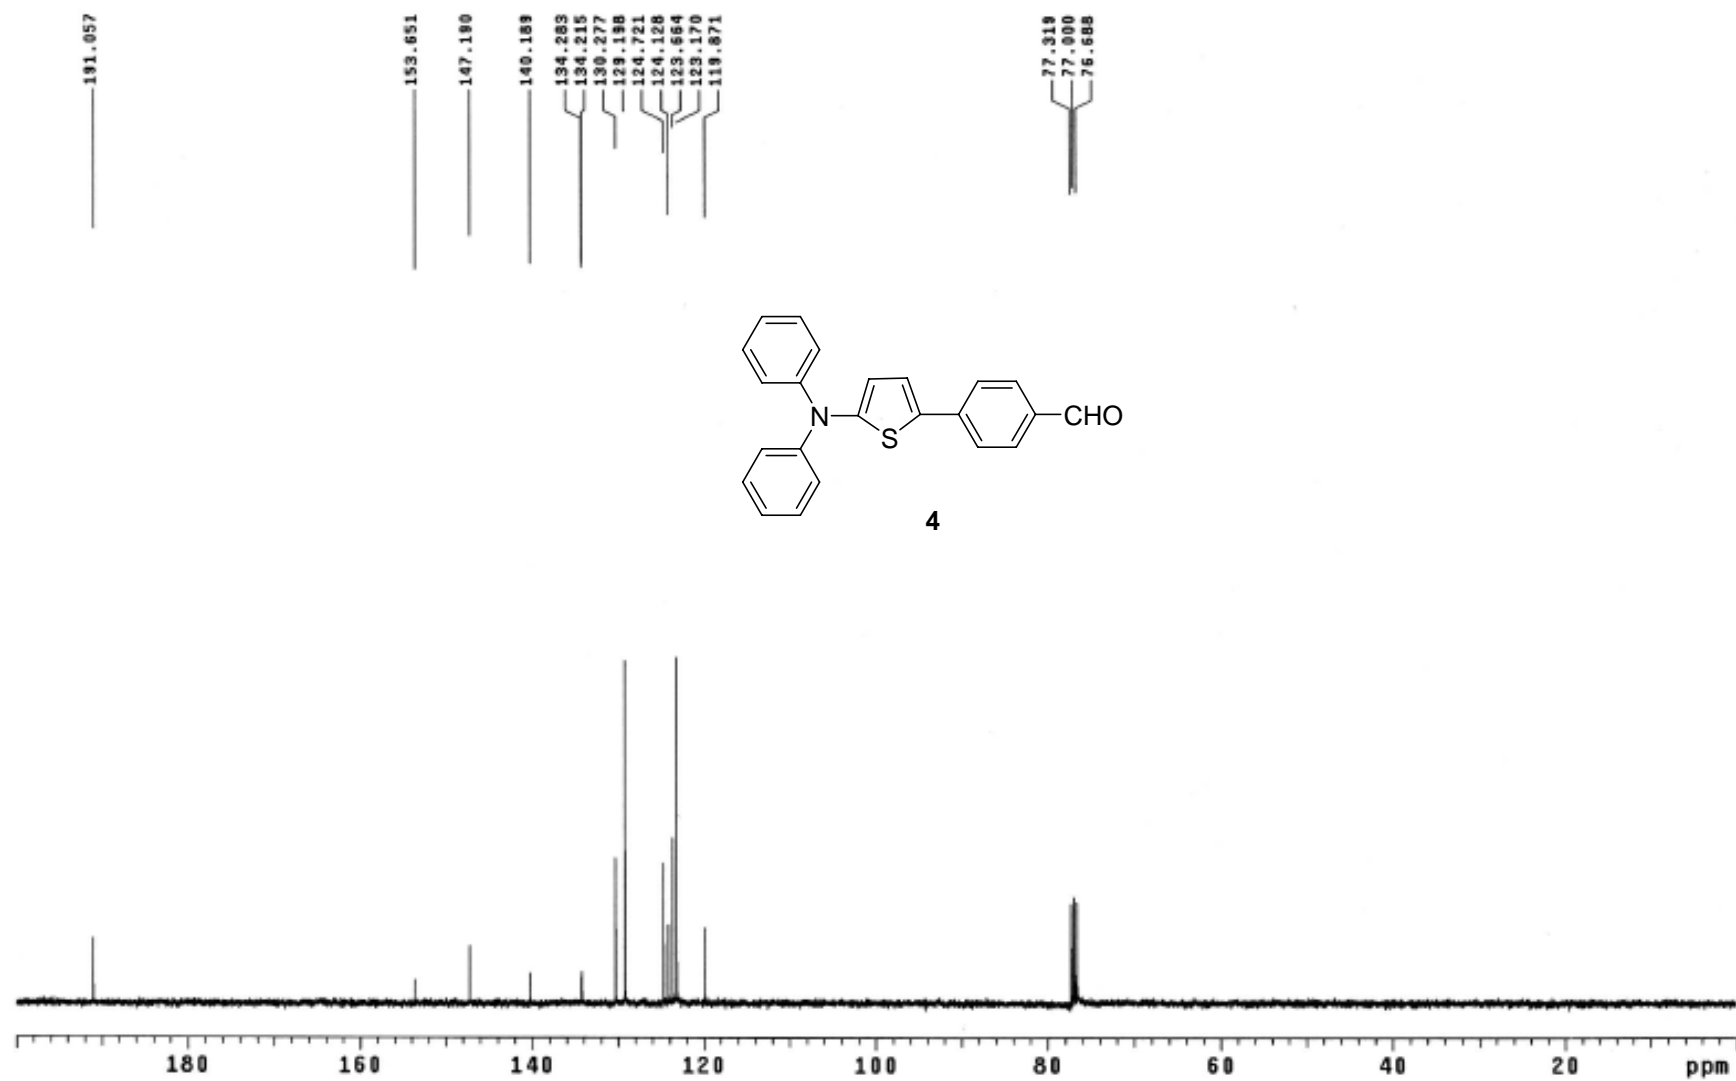

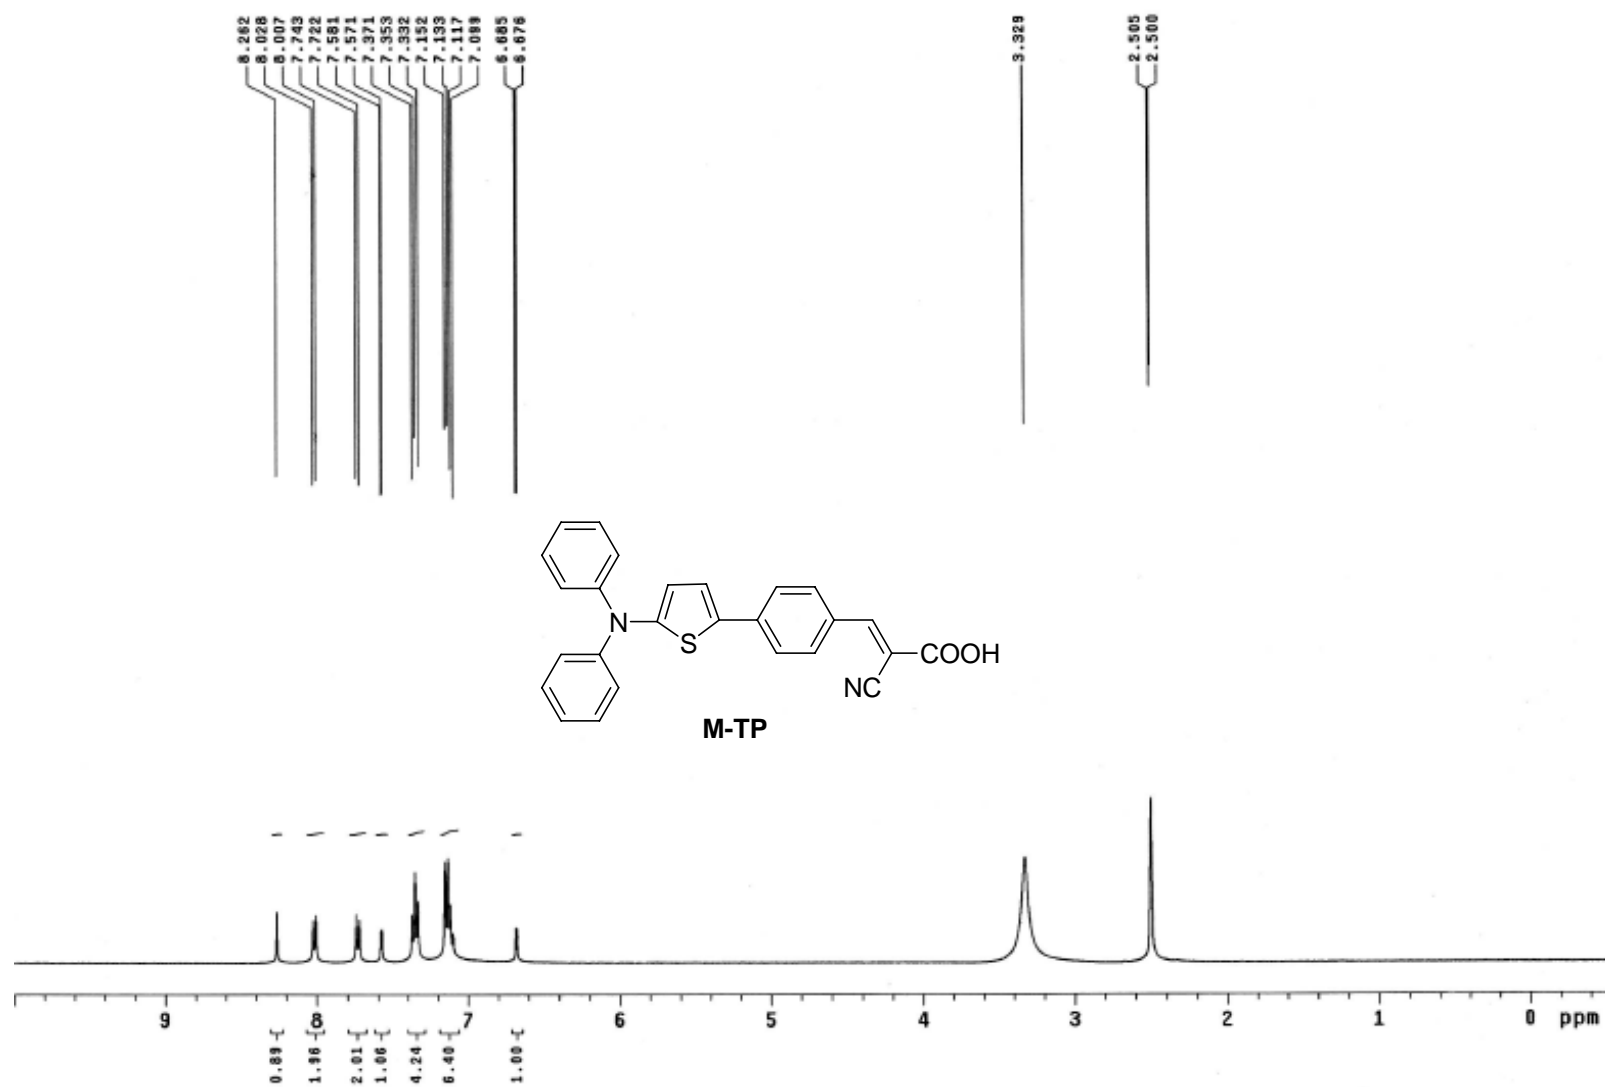

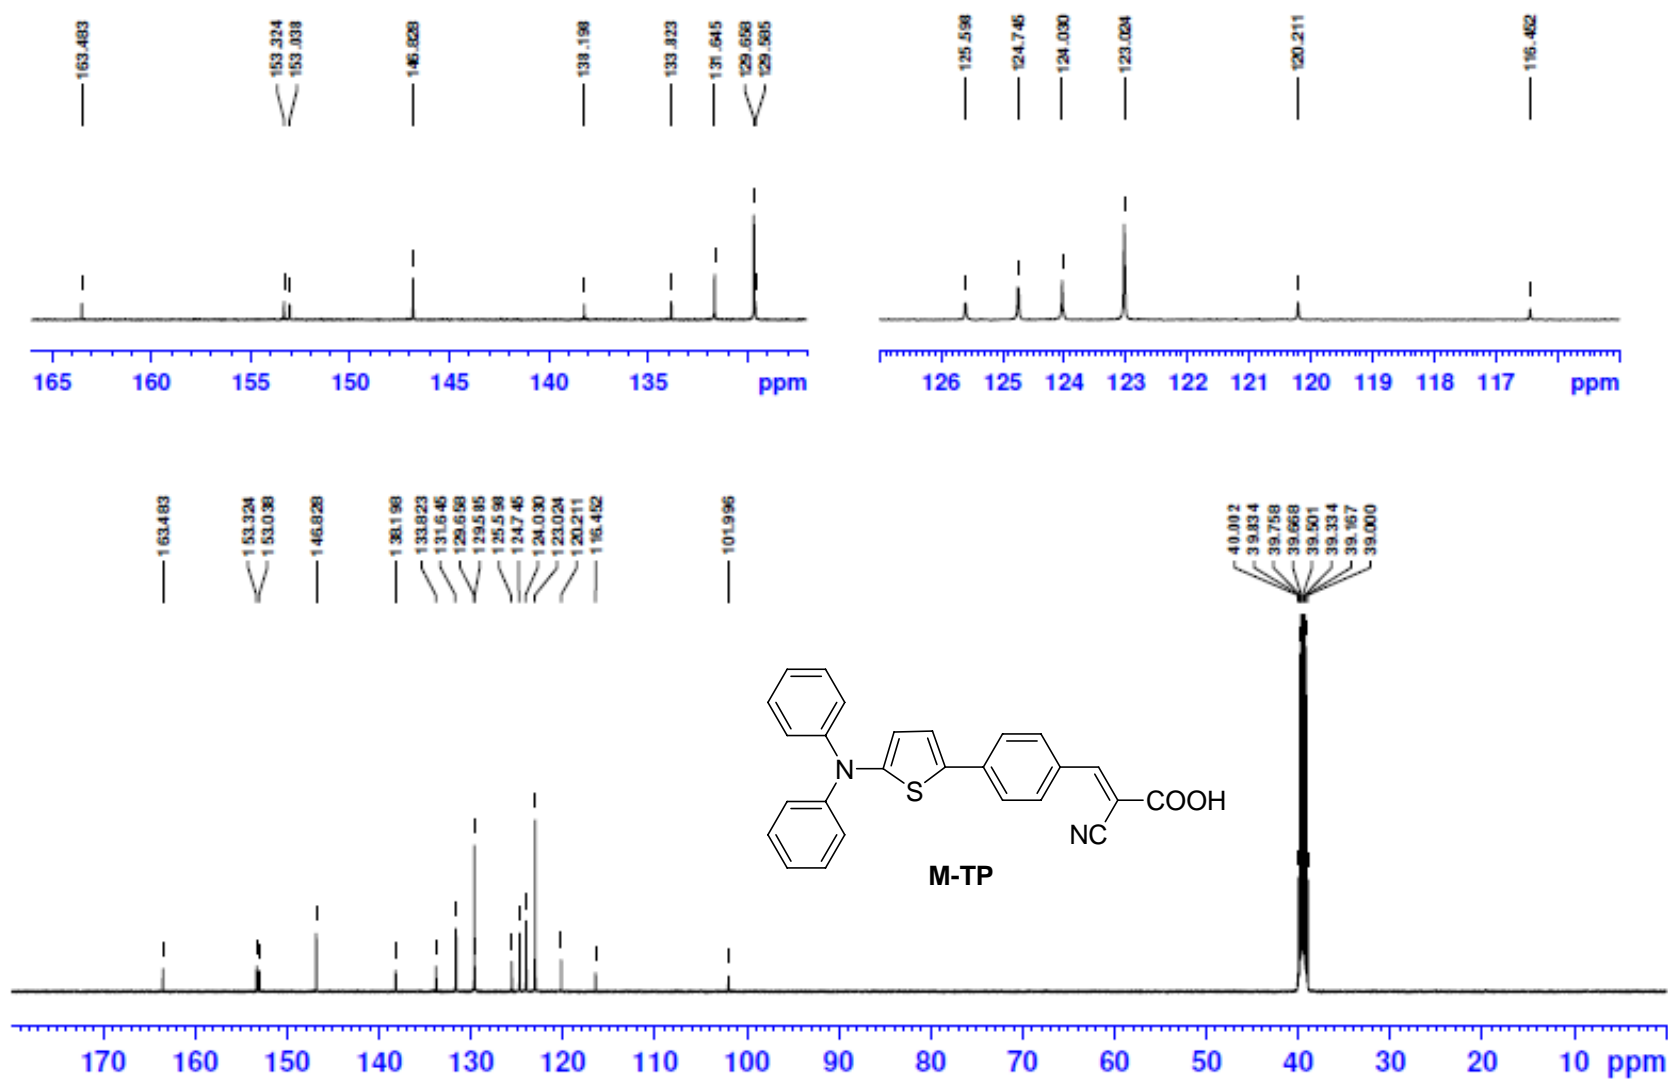

Supplement: c1jm10201j.pdf [file c1jm10201j.pdf]
